1 **Single cell sequencing of the small and AT-skewed genome of malaria parasites**

2

3 Shiwei Liu<sup>1</sup>, Adam C. Huckaby<sup>1</sup>, Audrey C. Brown<sup>1</sup>, Christopher C. Moore<sup>2</sup>, Ian Burbulis<sup>3, 5</sup>,  
4 Michael J. McConnell<sup>3, 4, 6</sup>, Jennifer L. Güler<sup>1, 2\*</sup>

5

6 <sup>1</sup>Department of Biology, University of Virginia, Charlottesville, VA.

7 <sup>2</sup>Division of Infectious Diseases and International Health, University of Virginia, Charlottesville,  
8 VA

9 <sup>3</sup>Department of Biochemistry and Molecular Genetics, University of Virginia School of  
10 Medicine, Charlottesville, VA

11 <sup>4</sup>Department of Neuroscience, University of Virginia School of Medicine, Charlottesville, VA

12 <sup>5</sup>Escuela de Medicina, Universidad San Sebastian, Puerto Montt, Chile

13 <sup>6</sup>Current address:

14 Lieber Institute for Brain Development, Baltimore, MD

15

16 \*Corresponding author contact: [jlg5fw@virginia.edu](mailto:jlg5fw@virginia.edu)

17

18

19

20

21

22

23

## 24 **Abstract**

25 Single cell genomics is a rapidly advancing field; however, most techniques are designed for  
26 mammalian cells. Here, we present a single cell sequencing pipeline for the intracellular parasite,  
27 *Plasmodium falciparum*, which harbors a relatively small genome with an extremely skewed  
28 base content. Through optimization of a quasi-linear genome amplification method, we achieve  
29 better targeting of the parasite genome over contaminants and generate coverage levels that  
30 allow detection of relatively small copy number variations on a single cell level. These  
31 improvements are important for expanding accessibility of single cell approaches to new  
32 organisms and for improving the study of adaptive mechanisms.

33

34 **Keywords: whole-genome amplification, AT-skewed genome, malaria, single cell**  
35 **sequencing, MALBAC, copy number variation**

36

## 37 **Background**

38 Malaria is a life-threatening disease caused by protozoan *Plasmodium* parasites. *P. falciparum*  
39 causes the greatest number of human malaria deaths [1]. The clinical symptoms of malaria occur  
40 when parasites invade human erythrocytes and undergo rounds of asexual reproduction by  
41 maturing from early forms into late stage parasites and bursting from erythrocytes to begin the  
42 cycle again [2]. In this asexual cycle, parasites possess a single haploid genome during the early  
43 stages; rapid genome replication in the later stages leads to an average of 16 genome copies [2].

44

45 Due to a lack of an effective vaccine, antimalarial drugs are required to treat malaria. However,  
46 drug efficacy is threatened by the frequent emergence of resistant populations [3]. Copy number

47 variations (CNVs), or the amplification and deletion of a genomic region, is one of the major  
48 sources of genomic variation in *P. falciparum* that contribute to antimalarial resistance [4–15].  
49 Similar to bacteria and viruses [16–18], a high rate of CNVs may initiate genomic changes that  
50 contribute to the rapid adaptation of this organism [7, 19]. Despite the importance of CNVs, their  
51 dynamics in evolving populations are not well understood.

52

53 The majority of CNVs in *P. falciparum* have been identified by analyzing bulk DNA in which  
54 the CNVs are present in a substantial fraction of individual parasites in the population due to  
55 positive selection [8, 10, 15, 20, 21]. However, many CNVs likely remain undetected because  
56 they are presumably either deleterious or offer no advantages for parasite growth or transmission  
57 and are therefore present in low frequency [20, 22]. Currently, CNVs can be identified using  
58 read-depth analysis of short read sequencing data, which derives an average signal across the  
59 population. For this reason, genetic variants must be present in a high frequency (i.e. ~50%) in  
60 the population to be detected [23–25]. Sequencing at very high depth improves the detection of  
61 low frequency CNVs, but the sensitivity is limited to large-scale CNVs present in > 5% cells  
62 [26–28]. Other analysis methods that rely on the detection of reads that span CNV junctions (i.e.  
63 split reads or discordant reads) have improved the sensitivity and specificity of CNV detection  
64 [29], but continue to struggle with minor allele detection. This latter method is useful for  
65 identifying precise CNV locations, while the read-depth method is required for estimating copy  
66 number of CNVs [30]. Because the two methods display distinct sensitivity and specificity for  
67 CNV detection, the combination of the two methods improves the accuracy of CNV detection  
68 [31].

69

70 Recent investigations have analyzed single cells to detect low frequency CNVs within  
71 heterogeneous populations [25, 32–36]. This approach provides a significant advantage for  
72 detecting rare genetic variants by no longer deriving an average signal from large quantities of  
73 cells. However, short read sequencing requires nanogram to microgram quantities of genomic  
74 material for library construction, which is many orders of magnitude greater than the genomic  
75 content of individual *Plasmodium* cells. Therefore, whole genome amplification (WGA) is  
76 required to generate sufficient DNA quantities. Several WGA approaches have been reported  
77 and each has advantages and disadvantages for different applications [37–40]; however, most  
78 were optimized for mammalian cell analysis [28, 38, 40–51]. Because WGA leads to high levels  
79 of variation in read abundance across the genome, CNV analysis in the single cell context is  
80 challenging. Previous approaches have been tuned specifically for CNV detection in mammalian  
81 genomes, which are generally hundreds of kb to Mb in size [28, 38, 40–51].

82  
83 To date, the detection of CNVs in single *P. falciparum* parasites using whole genome sequencing  
84 has not been achieved. The application of existing WGA methods is complicated by this  
85 parasite’s small genome size and extremely imbalanced base composition (23Mb haploid  
86 genome with 19.4% GC-content [52]). Each parasite haploid genome contains 25 femtograms of  
87 DNA, which is 278-times less than the ~6400Mb diploid human genome. Therefore, an effective  
88 *P. falciparum* WGA method must be both highly sensitive and able to handle the imbalanced  
89 base composition. One WGA method, multiple displacement amplification (MDA), has been  
90 used to amplify single *P. falciparum* genomes with near complete genome coverage [53, 54].  
91 These studies successfully detected single nucleotide polymorphisms between single parasites  
92 but did not report CNV detection, which is possibly disrupted by low genome coverage

93 uniformity [39], the generation of chimeric reads by MDA [55], and the relatively small size of  
94 CNVs in *P. falciparum* (broadly <100kb) [20, 22, 56, 57].

95

96 Multiple annealing and looping-based amplification cycling (MALBAC) is another WGA  
97 method that exhibits improved uniformity over MDA, which is advantageous for detecting  
98 CNVs in single cells [27]. MALBAC has the unique feature of quasi-linear pre-amplification,  
99 which reduces the bias associated with exponential amplification [27]. However, standard  
100 MALBAC is less tolerant to AT-biased genomes, unreliable with low DNA input, and prone to  
101 contamination [58–60]. Thus, optimization of this WGA method is necessary for *P. falciparum*  
102 genome analysis.

103

104 In this study, we developed a single cell sequencing pipeline for *P. falciparum* parasites, which  
105 included efficient isolation of single infected erythrocytes, an optimized WGA step inspired by  
106 MALBAC, and a sensitive method of assessing sample quality prior to sequencing. We tested  
107 our pipeline on erythrocytes infected with laboratory-reared parasites as well as patient-isolated  
108 parasites with heavy human genome contamination. Genome amplification using our optimized  
109 protocol showed increased genome coverage and better coverage uniformity when compared to  
110 standard MALBAC. Furthermore, we have detected CNVs in single cell genomes through the  
111 combination of discordant/split reads and read depth analysis methods. Building on these  
112 improvements will enable the detection of parasite-to-parasite heterogeneity to clarify the role of  
113 genetic variations, such as CNVs, in the adaptation of *P. falciparum*. This study also provides a  
114 framework for the optimization of single cell amplification and CNV analysis in other organisms  
115 with challenging genomes.

116

## 117 **Methods**

### 118 **Parasite Culture**

119 We freshly thawed erythrocytic stages of *P. falciparum* (Dd2, MRA-150, Malaria Research and  
120 Reference Reagent Resource Center, BEI Resources) from frozen stocks and maintained them as  
121 previously described [61]. Briefly, parasites were grown *in vitro* at 37°C in solutions of 3%  
122 hematocrit (serotype A positive human erythrocytes, Valley Biomedical, Winchester, VA) in  
123 RPMI 1640 (Invitrogen, USA) medium containing 24 mM NaHCO<sub>3</sub> and 25 mM HEPES, and  
124 supplemented with 20% human type A positive heat inactivated plasma (Valley Biomedical,  
125 Winchester, VA) in sterile, plug-sealed flasks, flushed with 5% O<sub>2</sub>, 5% CO<sub>2</sub>, and 90% N<sub>2</sub> [7].  
126 We maintained the cultures with media changes every other day and sub-cultured them as  
127 necessary to keep parasitemia below 5%. All parasitemia measurements were determined by  
128 SYBR green based flow cytometry [62]. Cultures were routinely tested using the LookOut  
129 Mycoplasma PCR Detection Kit (Sigma-Aldrich, USA) to confirm negative infection status.

130

### 131 **Clinical Sample Collection**

132 We obtained parasites from an infected patient admitted to the University of Virginia Medical  
133 Center with clinical malaria. The patient had a recent history of travel to Sierra Leone, a malaria-  
134 endemic country, and *P. falciparum* infection was clinically determined by a positive rapid  
135 diagnostic test and peripheral blood smear analysis. We obtained the sample of 1.4% early stage  
136 parasites within 24h of phlebotomy, incubated in the conditions described in Parasite Culture for  
137 48 hours and washed the sample 3 times with RPMI 1640 HEPES to decrease levels of white  
138 blood cells. In order to fully evaluate our amplification method in the presence of heavy human

139 genome contamination, we did not perform further leukodepletion. We set aside some of the  
140 sample for bulk DNA preparation (see *Bulk DNA Extraction*). Using another portion of the  
141 sample, we enriched for parasite-infected erythrocytes using SLOPE (Streptolysin-O Percoll)  
142 method [63], which increased the parasitemia from 1.4% to 48.5% (**Additional file 1: Figure**  
143 **S1**). We then isolated the single *P. falciparum*-infected erythrocytes using the CellRaft  
144 AIR<sup>TM</sup>System (Cell Microsystems, Research Triangle Park, NC) as detailed in *Parasite Staining*  
145 *and Isolation*.

146

### 147 **Bulk DNA Extraction**

148 We lysed asynchronous *P. falciparum*-infected erythrocytes with 0.15% saponin (Sigma-Aldrich,  
149 USA) for 5min and washed them with 1x PBS (diluted from 10x PBS Liquid Concentrate,  
150 Gibco, USA). We then lysed parasites with 0.1% Sarkosyl Solution (Bioworld, bioPLUS, USA)  
151 in the presence of 1mg/ml proteinase K (from *Tritirachium album*, Sigma-Aldrich, USA)  
152 overnight at 37°C. We extracted nucleic acids with phenol/chloroform/isoamyl alcohol (25:24:1)  
153 pH 8.0 (Sigma-Aldrich, USA) using 2ml light Phase lock Gels (5Prime, USA). Lastly, we  
154 precipitated the DNA with ethanol using the standard Maniatis method [64].

155

### 156 **Parasite Staining and Isolation**

157 For late stage parasite samples, we obtained laboratory *Dd2* parasite culture with a starting  
158 parasitemia of 1.7% (60% early stage parasites). We separated late stage *P. falciparum*-infected  
159 erythrocytes from non-paramagnetic early stages using a LS column containing MACS<sup>®</sup>  
160 microbeads (Miltenyi Biotec, USA, [65]). After elution of bound late stage parasite, the sample  
161 exhibited a parasitemia of 80.8% (74.0% late stage parasites, **Additional file 1: Figure S1**). For

162 early stage parasites, we obtained laboratory *Dd2* parasites culture with a starting parasitemia of  
163 3% (46% early stage parasites). We harvested the non-paramagnetic early stages parasites which  
164 were present in the flow-through of the LS column containing MACS<sup>®</sup> microbeads. Next, we  
165 enriched the infected erythrocytes using the SLOPE method, which preferentially lysed  
166 uninfected erythrocytes [63]. The final parasitemia of enriched early stage parasites was 22.8%  
167 (97.0% early stage parasites, **Additional file 1: Figure S1**). To differentiate *P. falciparum*-  
168 infected erythrocytes from remaining uninfected erythrocytes or cell debris, we stained the stage  
169 specific *P. falciparum*-infected erythrocytes with both SYBR green and MitoTracker Red  
170 CMXRos (Invitrogen, USA). We then isolated single *P. falciparum*-infected erythrocytes using  
171 the CellRaft AIR<sup>™</sup> System (Cell Microsystems, Research Triangle Park, NC). We coated a 100-  
172 micron single reservoir array (CytoSort Array and CellRaft AIR user manual, CELL  
173 Microsystems) with Cell-Tak Cell and Tissue Adhesive (Corning, USA) following the  
174 manufacture's recommendations. Then, we adhered erythrocytes on to the CytoSort array from a  
175 cell suspension of ~20,000 cells in 3.5mL RPMI 1640 (Invitrogen, USA) with AlbuMAX II  
176 Lipid-Rich BSA (Thermo Fisher Scientific, USA) and Hypoxanthine (Sigma-Aldrich, USA).  
177 Lastly, we set up the AIR<sup>™</sup> System to automatically transfer the manually selected single  
178 infected erythrocytes (SYBR+, Mitotracker+) into individual PCR tubes.

179

### 180 **Steps to Limit Contamination**

181 We suspended individual parasite-infected erythrocytes in freshly prepared lysis buffer, overlaid  
182 them with one drop (approx. 25µl) of mineral oil (light mineral oil, BioReagent grade  
183 for molecular biology, Sigma Aldrich, USA), and stored them at -80°C until WGA. We  
184 amplified DNA in a clean positive pressure hood located in a dedicated room, using dedicated



185 reagents and pipettes, and stored them in a dedicated box at -20°C. We wore a new disposable  
186 lab coat, gloves and a face mask during reagent preparation, cell lysis, and WGA steps. We  
187 decontaminated all surfaces of the clean hood, pipettes, and tube racks with DNAZap (PCR  
188 DNA Degradation Solutions, Thermo Fisher Scientific, USA), followed by Cavicide (Metrex  
189 Research, Orange, CA), and an 80% ethanol rinse prior to each use. We autoclaved all tubes,  
190 tube racks and the waste bin on a dry vacuum cycle for 45min. Finally, we used sealed sterile  
191 filter tips, new nuclease-free water (Qiagen, USA) for each experiment, and filtered all salt  
192 solutions through a 30mm syringe filter with 0.22µm pore size (Argos Technologies, USA)  
193 before use in each experiment.

194

## 195 **Whole Genome Amplification**

196 **Standard MALBAC:** The MALBAC assay was originally designed for human cells [27, 50].

197 This approach involved making double stranded DNA copies of genomic material using random  
198 primers that consist of 5 degenerate bases and 27 bases of common sequence. These linear cycles  
199 are followed by exponential amplification of via suppression PCR. Here, we transferred  
200 individual cells into sterile thin-wall PCR tubes containing 2.5µl of lysis buffer that yielded a  
201 final concentration of 25mM Tris pH 8.8 (Sigma-Aldrich, USA), 10mM NaCl (BAKER  
202 ANALYZED A.C.S. Reagent, J.T.Baker, USA), 10mM KCl (ACS reagent, Sigma-Aldrich,  
203 USA), 1mM EDTA (molecular biology grade, Promega, USA), 0.1% Triton X-100 (Acros  
204 Organics, USA), 1mg/ml Proteinase K (*Tritirachium album*, Sigma-Aldrich, USA). After  
205 overlaying one drop of mineral oil, we lysed cells at 50°C for 3h and inactivated the proteinase at  
206 75°C for 20min, then 80°C for 5min before maintaining at 4°C. We added 2.5µl of  
207 amplification buffer to each sample to yield a final concentration of 25mM Tris pH 8.8 (Sigma-

208 Aldrich, USA), 10mM (NH<sub>4</sub>)<sub>2</sub>SO<sub>4</sub> (Molecular biology grade, Sigma-Aldrich, USA), 8mM  
209 MgSO<sub>4</sub> (Fisher BioReagents, Fisher Scientific, Product of India), 10mM KCl (ACS reagent,  
210 Sigma-Aldrich, USA), 0.1% Triton X-100 (Acros Organics, USA), 2.5mM dNTP's (PCR grade,  
211 Thermo Fisher Scientific, USA), 1M betaine (PCR Reagent grade, Sigma-Aldrich, USA) and  
212 0.667μM of each random primer (5'GTGAGTGATGGTTGAGGTAGTGTGGAGNNNNNTTT  
213 3', and 5'GTGAGTGATGGTTGAGGTAGTGTGGAGNNNNNGGG 3') ordered from  
214 Integrated DNA Technologies, USA. To denature DNA, we heated samples to 95°C for 3min  
215 and snap-cooled on an ice slush before gently adding 0.5μl of enzyme solution (8,000  
216 U/ml *Bst* DNA Polymerase Large Fragment, New England Biolabs, USA, in  
217 1X amplification buffer) into the aqueous droplet.

218

219 We placed the samples into a thermo-cycler (Bio-Rad, USA) holding at 4°C and heated  
220 according to the following cycles: 10°C – 45s, 15°C – 45s, 20°C – 45s, 30°C – 45s, 40°C – 45s,  
221 50°C – 45s, 64°C – 10min, 95°C – 20s. The samples were immediately snap-cooled on an ice  
222 slush and held for at least 3min to maintain the DNA in a denatured state for the next round of  
223 random priming. We added another 0.5μl of enzyme solution and mixed thoroughly with a  
224 pipette on ice as above. We placed the samples back into the 4°C thermo-cycler and heated  
225 according to the cycles listed above with an additional 58°C step for 1min before once again  
226 cooling on an ice slush for 3min. We repeated the addition of enzyme mix (as above) and  
227 performed additional rounds of amplification cycles (as above, including the 58°C step). Once  
228 completed, we placed the samples on ice and supplemented with cold PCR master mix to yield  
229 50μl with the following concentrations: 0.5μM Common Primer  
230 (5'GTGAGTGATGGTTGAGGTAGTGTGGAG3', Integrated DNA Technologies, USA),

231 1.0mM dNTPs (PCR grade, Thermo Fisher Scientific, USA), 6.0mM MgCl<sub>2</sub> (Molecular biology,  
232 Sigma-Aldrich, USA), 1X Herculase II Polymerase buffer and 1X Herculase II polymerase  
233 (Agilent Technologies, USA). We immediately thermo-cycled samples with the following  
234 temperature-time profile: 94°C – 40s, 94°C – 20s, 59°C – 20s, 68°C – 5min, go to step two for  
235 several times, and an additional extended at 68°C – 5min, and finally, a hold at 4 °C. For  
236 comparison, we used 18/19 linear cycles and 17 exponential cycles for single parasite genomes  
237 amplified by the standard MALBAC protocol.

238

239 **Optimized MALBAC:** We made the following modifications to standard MALBAC to produce  
240 our improved method. **1)** We froze cells at -80°C until usage because freeze-thaw enhanced cell  
241 lysis as previously reported [54]; **2)** We removed betaine from the amplification buffer because it  
242 improved amplification of GC-rich sequences [66], which are infrequent in *P. falciparum*  
243 genomes (**Additional file 2: Table S1**); **3)** We used a single random primer where the GC-  
244 content of the degenerate bases were 20% instead of 50%  
245 (5'GTGAGTGATGGTTGAGGTAGTGTGGAGNNNNNTTT 3') at final concentration of  
246 1.2µM; **4)** We reduced the volume of the random priming reaction by added only 0.29µl of  
247 2X amplification buffer to the lysed samples and 0.13µl of enzyme solution to the aqueous  
248 droplet each amplification cycle; **5)** We added additional random priming cycles over prior  
249 MALBAC studies for a total of 18 (for late stage parasites) or 19 (for early stage parasites)  
250 cycles; **6)** We reduced the total volume of exponential amplification from 50µl to 20µl and  
251 increased the number of exponential amplification cycles from 15 to 17; **7)** We verified the  
252 presence of high molecular weight DNA products in the samples before purifying nucleic acids  
253 by Zymo DNA Clean & Concentrator-5 (ZYMO Research).

254

## 255 Pre-Sequencing Quality Assessment

256 We assayed 6 distinct genomic loci across different chromosomes to determine variations in  
257 copy number following the whole genome amplification step. We included this step, which  
258 employs highly sensitive droplet digital PCR (ddPCR, QX200 Droplet Digital PCR  
259 system, Bio-Rad, USA), to identify samples that exhibited more even genome coverage prior to  
260 short read sequencing. The sequence of primers and probes are described in **Additional file 2:**  
261 **Table S2** [7, 67, 68]. Each ddPCR reaction contained 5 $\mu$ l of DNA (0.3ng/ $\mu$ l for single cell  
262 samples), 10 $\mu$ l ddPCR Supermix for Probes (without dUTP), primers and probes with the final  
263 concentration in **Additional file 2: Table S2**, and sterile H<sub>2</sub>O to bring the per-reaction volume to  
264 22 $\mu$ l. We prepared droplets with the PCR mixture following the manufacture's protocol: 95°C –  
265 10 min; 40 cycles of 95°C – 30s, 60°C – 60s, and an infinite hold at 4°C. After thermal cycling,  
266 we counted positive droplets using the Bio-Rad QX200 Droplet Reader (Bio-Rad, USA). We  
267 analyzed data through QuantaSoft (Bio-Rad, USA). For each gene, a no template control (sterile  
268 water, NTC) and a positive control (0.025ng *Dd2* genomic DNA) are included in each ddPCR  
269 run. Following ddPCR, we calculated the “uniformity score” using the locus representation of  
270 the 6 genes: *seryl tRNA synthetase* (gene-1, PF3D7\_0717700), *heat shock protein 70* (gene-2,  
271 PF3D7\_0818900), *dihydrofolate reductase* (gene-3, PF3D7\_0417200), *lactate dehydrogenase*  
272 (gene-4, PF3D7\_1324900), *18S ribosomal RNA* (gene-5, PF3D7\_0112300, PF3D7\_1148600,  
273 PF3D7\_1371000), and *multi-drug resistance transporter 1* (*Pfmdr1*, gene-6, PF3D7\_0523000) in  
274 the amplified DNA sample relative to non-amplified DNA using the following equation:

$$\begin{aligned} \text{Uniformityscore} = & \frac{\text{gene1}}{\text{gene2}} + \frac{\text{gene1}}{\text{gene3}} + \frac{\text{gene1}}{\text{gene4}} + \frac{\text{gene1}}{\text{gene5}} + \frac{\text{gene1}}{\text{gene6}} + \frac{\text{gene2}}{\text{gene3}} + \frac{\text{gene2}}{\text{gene1}} + \frac{\text{gene2}}{\text{gene4}} + \frac{\text{gene2}}{\text{gene5}} \\ 275 & + \frac{\text{gene2}}{\text{gene6}} + \frac{\text{gene3}}{\text{gene4}} + \frac{\text{gene3}}{\text{gene1}} + \frac{\text{gene3}}{\text{gene2}} + \frac{\text{gene3}}{\text{gene5}} + \frac{\text{gene3}}{\text{gene6}} + \frac{\text{gene4}}{\text{gene5}} + \frac{\text{gene4}}{\text{gene1}} + \frac{\text{gene4}}{\text{gene2}} + \frac{\text{gene4}}{\text{gene3}} + \frac{\text{gene4}}{\text{gene6}} \\ & + \frac{\text{gene5}}{\text{gene1}} + \frac{\text{gene5}}{\text{gene2}} + \frac{\text{gene5}}{\text{gene3}} + \frac{\text{gene5}}{\text{gene4}} + \frac{\text{gene5}}{\text{gene6}} + \frac{\text{gene6}}{\text{gene1}} + \frac{\text{gene6}}{\text{gene2}} + \frac{\text{gene6}}{\text{gene3}} + \frac{\text{gene6}}{\text{gene4}} + \frac{\text{gene6}}{\text{gene5}} \end{aligned}$$

276 When certain loci were over- or under-represented in the amplified sample, this score increased  
277 above the perfect representation of the genome; a uniformity score of 30 indicates that all genes  
278 are equally represented. We calculated the locus representation from the absolute copies of a  
279 gene measured by ddPCR from 1ng of amplified DNA divided by the absolute copies from 1ng  
280 of the bulk DNA control [69]. We only included samples in which all six genes were detected by  
281 ddPCR. The relative copy number of the *Pfmdr1*, which was amplified in the *Dd2* parasite line  
282 [6], was also used to track the accuracy of amplification. We calculated this value by dividing the  
283 ddPCR-derived absolute copies of *Pfmdr1* by the average absolute copies of the 6 assayed loci  
284 (including *Pfmdr1*, normalized to a single copy gene). To confirm the efficiency of ddPCR  
285 detection as a pre-sequencing quality control step, we determined the strength of association  
286 based on the pattern of concordance and discordance between the ddPCR detection and the  
287 sequencing depth of the 5 gene targets with Kendall rank correlation (*18S ribosomal RNA* was  
288 excluded from correlation analysis due to the mapping of non-unique reads). We then calculated  
289 the correlation coefficient (**Additional file 2: Table S3**). When the level of ddPCR detection  
290 corresponded to the sequencing depth in at least 3 of the 5 gene targets (a correlation coefficient  
291 of >0.6), we regarded the two measurements as correlated.

292

### 293 **Short Read Sequencing**

294 We fragmented MALBAC amplified DNA (>1ng/μL, 50μL) using Covaris M220 Focused  
295 Ultrasonicator in microTUBE-50 AFA Fiber Screw-Cap (Covaris, USA) to a target size of 350bp  
296 using a treatment time of 150s. We determined the fragment size range of all sheared DNA  
297 samples (291bp-476bp) with a Bioanalyzer on HS DNA chips (Agilent Technologies, USA). We  
298 used the NEBNext Ultra DNA Library Prep Kit (New England Biolabs, USA) to generate

299 Illumina sequencing libraries from sheared DNA samples. Following adaptor ligation, we  
300 applied 3 cycles of PCR enrichment to ensure representation of sequences with both adaptors and  
301 the size of the final libraries range from 480bp to 655bp. We quantified the proportion of  
302 adaptor-ligated DNA using real-time PCR and combined equimolar quantities of each library for  
303 sequencing on 4 lanes of an Illumina Nextseq 550 using 150bp paired end cycles. We prepared  
304 the sequencing library of clinical bulk DNA as above but sequenced it on an Illumina Miseq  
305 using 150bp paired end sequencing.

306

### 307 **Sequencing Analysis**

308 We performed read quality control and sequence alignments essentially as previously described  
309 [56] (**Additional file 1: Figure S2A**). Briefly, we removed Illumina adaptors and PhiX reads,  
310 and trimmed MALBAC common primers from reads with BBDuk tool in BBMap [70]. To  
311 identify the source of DNA reads, we randomly subsetted 10,000 reads from each sample by  
312 using the reformat tool in BBMap [70] and blasted reads in nucleotide database using BLAST+  
313 remote service. We aligned each fastq file to the hg19 human reference genome and kept the  
314 unmapped reads (presumably from *P. falciparum*) for analysis. Then, we aligned each fastq file  
315 to the 3D7 *P. falciparum* reference genome with Speedseq [71]. We discarded the reads with  
316 low-mapping quality score (below 10) and duplicated reads using Samtools [72]. To compare the  
317 coverage breadth (the percentage of the genome that has been sequenced at a minimum depth of  
318 one mapped read, [73]) between single cell samples, we extracted mappable reads from BAM  
319 files using Samtools [72] and randomly downsampled to 300,000 reads using the reformat tool in  
320 BBMap [70]. This level is dictated by the sample with the lowest number of mappable reads

321 (ENM, **Additional file 2: Table S4**). We calculated the coverage statistics using Qualimap 2.0  
322 [74] for the genic, intergenic and whole genome regions.

323

324 To understand where the primers of MALBAC amplification are annealing to the genome, we  
325 overlaid information on the boundaries of genic or intergenic regions with the mapping position  
326 of reads containing the MALBAC primer common sequence. To do so, we kept the MALBAC  
327 common primers in the sequencing reads, filtered reads and aligned reads as in the above  
328 analysis. We subsetted BAM files for genic and intergenic regions using Bedtools, searched for  
329 the MALBAC common primer sequence using Samtools, and counted reads with MALBAC  
330 common primer using the pileup tool in BMAP (**Additional file 2: Table S5**).

331

332 We conducted single cell sequencing analysis following the steps in **Additional file 1: Figure**  
333 **S2B**. We compared the variation of normalized read abundance (log<sub>10</sub> ratio) at different bin  
334 sizes using boxplot analysis (R version 3.6.1) and determined the bin size of 20 kb using the  
335 plateau of decreasing variation of normalized read abundance (log<sub>10</sub> ratio) when increasing bin  
336 sizes. We then divided the *P. falciparum* genome into non-overlapping 20 kb bins using Bedtools  
337 [75]. The normalized read abundance was the mapped reads of each bin divided by the total  
338 average reads in each sample. To show the distribution of normalized read abundance along the  
339 genome, we constructed circular coverage plots using Circos software and ClicO FS [76, 77]. To  
340 assess uniformity of amplification, we calculated the coefficient of variation of normalized read  
341 abundance by dividing the standard deviation by the mean and multiplying by 100 [39, 78] and  
342 analyzed the equality of coefficients of variation using the R package “cvequality” version 0.2.0  
343 [79]. We employed correlation coefficients to assess amplification reproducibility as previous

344 studies [80]. Due to presence of non-linear correlations between some of the samples, we used  
345 Spearman correlation for this analysis. We removed outlier bins if their read abundance was  
346 above the highest point of the upper whisker ( $Q3 + 1.5 \times \text{interquartile range}$ ) or below the lowest  
347 point of the lower whisker ( $Q1 - 1.5 \times \text{interquartile range}$ ) in each sample. Then, we subsetted  
348 remaining bins present in all samples to calculate the correlation coefficient using the R package  
349 “Hmisc” version 4.3-0 [81]. We visualized Spearman correlations, histograms and pairwise  
350 scatterplots of normalized read abundance using “pairs.panels” in the “psych” R package. We  
351 then constructed heatmaps and hierarchical clustering of Spearman correlation coefficient with  
352 the “gplots” R package version 3.0.1.1 [82]. Additionally, to estimate the chance of random  
353 primer annealing during MALBAC pre-amplification cycles (likely affected by the GC content  
354 of genome sequence), we generated all possible 5-base sliding windows with 1 base step-size in  
355 the *P. falciparum* genome and calculated the GC-content of the 5-bases windows using Bedtools  
356 (**Additional file 2: Table S1**) [75].

357  
358 We conducted single cell CNV analysis following the steps in **Figure S2C**. To ensure reliable  
359 CNV detection, our CNV analysis is limited to the core genome, as defined previously [83].  
360 Specifically, we excluded the telomeric, sub-telomeric regions and hypervariable *var* gene  
361 clusters, due to limited mappability of these regions. For discordant/split read analysis, we used  
362 LUMPY [84] in Speedseq to detect CNVs with at least two supporting reads in each sample  
363 (**Additional file 2: Table S6**). For read-depth analysis, we further filtered the mapped reads  
364 using a mapping quality score of 30. We counted the reads in 1kb, 5kb, 8kb, 10kb bins by  
365 Bedtools and used Ginkgo to normalize (by dividing the count in each bin by the mean read  
366 count across all bins), correct the bin read counts for GC bias, independently segment (using a



367 minimum of 5 bins for each segment), and determine the copy number state in each sample with  
368 a predefined ploidy of 1 ([85], **Additional file 2: Table S7**). The quality control steps of Ginkgo  
369 were replaced by the coefficient of variation of normalized read count used in this study to assess  
370 uniformity in each cell. Lastly, we identified shared CNVs from the two methods when one CNV  
371 overlapped with at least 50% of the other CNV and vice versa (50% reciprocal overlap).

372

## 373 **Results**

### 374 ***Plasmodium falciparum* genomes from single-infected erythrocytes are amplified by** 375 **MALBAC**

376 Our single cell sequencing pipeline for *P. falciparum* parasites included stage-specific parasite  
377 enrichment, isolation of single infected erythrocytes, cell lysis, whole genome amplification, pre-  
378 sequencing quality control, whole genome sequencing, and analysis steps (**Figure 1A**). We  
379 collected parasites from either an *in vitro*-propagated laboratory line (*Dd2*) or from a blood  
380 sample of an infected patient (referred to as ‘laboratory’ and ‘clinical’ parasites, respectively).  
381 This allowed us to test the efficiency of our procedures on parasites from different environments  
382 with varying amounts of human host DNA contamination. Furthermore, for laboratory samples,  
383 we isolated both early (1n) and late (~16n) stage parasite-infected erythrocytes to evaluate the  
384 impact of parasite DNA content on the performance of WGA. For single cell isolation, we used  
385 the microscopy-based CellRaft Air system (**Figure 1B**), which has the benefit of low capture  
386 volume (minimum: 2µl) and visual confirmation of parasite stages. Following isolation, using the  
387 standard MALBAC protocol (termed non-optimized MALBAC), we successfully amplified 3  
388 early (ENM) and 4 late stage (LNM) laboratory samples. We also applied a version of MALBAC  
389 that we optimized for the small AT-rich *P. falciparum* genome (termed optimized MALBAC) to

390 42 early (EOM) and 20 late stage (LOM) laboratory samples as well as 4 clinical samples  
391 (COM) (**Additional file 2: Table S8**). Compared to standard MALBAC, our optimized protocol  
392 had a lower reaction volume, more amplification cycles, and a modified pre-amplification  
393 random primer (see *Methods* for more details). Using this method, we successfully amplified  
394 43% of the early and 90% of the late stage laboratory samples and 100% of the clinical samples  
395 (see post-amplification yields in **Additional file 2: Tables S8 and S9**).

396

397 **A novel pre-sequencing quality control step identifies samples with more even genome**  
398 **amplification.**

399 We assessed the quality of WGA products from single cells using droplet digital PCR (ddPCR)  
400 to measure the copy number of single and multi-copy genes dispersed across the *P. falciparum*  
401 genome (6 genes in total including *Pfmdr1*, which is present at ~3 copies in the *Dd2* laboratory  
402 parasite line). Using this sensitive quantitative method, along with calculation of a “uniformity  
403 score” which reflects both locus dropout and over-amplification, we were able to select genomes  
404 that had been more evenly amplified; a low uniformity score and accurate copy number values  
405 indicated a genome that has been amplified with less bias (see *Methods* for details on score  
406 calculation and **Additional file 2: Table S10** for primary data). This quality control step was  
407 important to reduce unnecessary sequencing costs during single cell studies.

408

409 When we analyzed differences between successfully amplified samples by optimized MALBAC  
410 (17 EOM samples and 14 LOM samples processed for ddPCR evaluation) and non-optimized  
411 MALBAC (3 ENM and 4 LNM samples), we found that samples amplified with the optimized  
412 protocol were more evenly covered than those from the standard method (**Table 1**). Based on the

413 results of ddPCR detection, we selected a subset of 13 EOM and 10 LOM samples for  
414 sequencing (**Additional file 2: Table S8**). Overall, selected samples had lower average  
415 uniformity scores (i.e. 248 and 1012 for selected and unselected EOMs, respectively, see **Table**  
416 **1**). For clinical parasite samples, 3 out of 4 COM samples showed a lack of ddPCR detection on  
417 at least one parasite gene; thus, we were not able to calculate a uniformity score for these  
418 samples and the amplification of clinical genomes was likely more skewed than laboratory  
419 samples (**Table 1**).

420

421 Both standard and optimized MALBAC-amplified parasite genomes were short read sequenced  
422 alongside a matched bulk DNA control (**Table 1**). To confirm the efficiency of ddPCR detection  
423 as a pre-sequencing quality control step, we calculated the correlation between ddPCR  
424 quantification and the sequencing depth at these specific loci. We found that the ddPCR-derived  
425 gene copy concentration was correlated with sequencing coverage of the corresponding genes in  
426 many samples (**Additional file 2: Table S3**, 17 out of 28 samples are correlated, Kendal rank  
427 correlation coefficient  $\geq 0.6$ ), confirming the validity of using ddPCR detection as a quality  
428 control step prior to sequencing.

429

#### 430 **Optimized MALBAC limits contamination of single cell samples.**

431 After read quality control steps, we mapped the reads to the *P. falciparum* 3D7 reference genome  
432 (see *Methods* and **Additional file 1: Figure S2** for details). We first assessed the proportion of  
433 contaminating reads in our samples; NCBI Blast results showed that the majority of non-*P.*  
434 *falciparum* reads were of human origin (**Figure 2A**). The proportions of human reads in 6 out of  
435 13 EOM samples (1.1%-6.9%) and 8 out of 10 LOM samples (1.4%-6.1%) were lower than that

436 in the control bulk sample (7.4%, **Figure 2A**). Conversely, the proportion of human reads in  
437 ENM and LNM samples were much higher (81.8% and 18.9%, respectively). As shown in other  
438 studies [86, 87], our clinical bulk DNA (81.9%) contained a much higher level of human  
439 contamination than the laboratory *Dd2* bulk DNA (7.4%). However, we found that the  
440 proportion of the human contaminating DNA in the two single cell COM samples was  
441 considerably lower (58.8% and 65.5%). The second most common source of contaminating reads  
442 was from bacteria such as *Staphylococcus* and *Cutibacterium*. The ENM sample exhibited a ~10-  
443 fold increase in the proportion of bacterial reads over averaged EOM samples (8.2% versus  
444 0.8%, respectively) whereas the LNM samples showed the same proportion of bacterial reads as  
445 the averaged LOM samples (0.2%). These results indicated that the optimized MALBAC  
446 protocol reduced the amplification bias towards contaminating human and bacterial genomes.

447

#### 448 **Optimized MALBAC reduces amplification bias of single cell samples.**

449 To further assess the optimized MALBAC protocol, we evaluated GC-bias at several steps of our  
450 pipeline (i.e. WGA, library preparation, and the sequencing platform itself). Analysis of the bulk  
451 genome control (without WGA) indicated that there was little GC-bias introduced by the library  
452 preparation, sequencing, or genome alignment steps; the GC-content of mapped reads from bulk  
453 sequencing data is 18.9% (**Table 2**), which was in line with the GC-content (19.4%) of the  
454 reference genome [52]. We then compared values from single cell samples to those from the  
455 appropriate bulk control to evaluate the GC-bias caused by MALBAC amplification (**Figure**  
456 **2B**). The average GC-content of all EOM (21.4%), LOM (22.4%), and COM (20.7%) samples  
457 was within 1-3.5% of the bulk controls from laboratory and clinical samples (18.9% and 19.7%,  
458 respectively, **Table 2**). However, the average GC-content of ENM and LNM samples was 6.1%

459 and 5.4% greater than that of the bulk control; this results is consistent with the high GC  
460 preference of the standard protocol [38, 60]. ENM and LNM samples also showed a greater  
461 proportion of mapped reads with high GC-content (>30%) than EOM, LOM, and bulk DNA  
462 samples (**Figure 2B**).

463  
464 Since GC-bias during the amplification step can limit which areas of the genome are sequenced,  
465 we assessed whether the optimization of MALBAC improved genome coverage. The coverage  
466 breadth of single cell samples increased by 34.9% in early stage samples (**Figure 2C**, orange-  
467 ENM to grey-EOM lines) and by 9.9% for late stage samples following optimization (**Figure**  
468 **2C**, red-LNM to purple-LOM lines, see values in **Table 2**). Even when we randomly down-  
469 sampled reads to the same number per sample (300,000), EOM and LOM samples continued to  
470 show improved coverage breadth over ENM and LOM samples (**Table 2**). Even though  
471 optimized MALBAC showed less bias towards GC-rich sequences, it was still problematic for  
472 highly AT-rich and repetitive intergenic regions (mean of 13.6% GC-content, [52]). The fraction  
473 of intergenic regions covered by reads was only 27.8% for EOM samples and 25.0% for LOM  
474 samples on average. When we excluded intergenic regions, the fraction of genic regions of the  
475 genome covered by at least one read reached an average of 78.0% and 79.0% for EOM and LOM  
476 samples (**Table 2**). Conversely, the coverage of intergenic and genic regions was significantly  
477 lower for the non-optimized samples. Coverage of the *P. falciparum* genome in the clinical bulk  
478 sample was very low due to heavy contamination with human reads (0.3% of the genome was  
479 covered by at least one read). This was much lower than that from the 2 COM samples (an  
480 average of 48%, **Figure 2C** and **Table 2**).

481

482 **Optimized MALBAC improves uniformity of single cell genomes.**

483 To investigate the uniformity of read abundance distributed over the *P. falciparum* genome, we  
484 divided the reference genome into 20kb bins and plotted the read abundance in these bins over  
485 the 14 chromosomes (**Figure 3A, Additional file 1: Figure S3 and S4A**). We selected a 20kb  
486 bin size based on its relatively low coverage variation compared to smaller bin sizes and similar  
487 coverage variation as the larger bin sizes (**Additional file 1: Figure S5**). To quantitatively  
488 measure this variation, we normalized the read abundance per bin in each sample by dividing the  
489 raw read counts with the mean read counts per 20kb bin (**Figure 3B, Additional file 1: Figure**  
490 **S3C**). Here, the bulk control displayed the smallest range of read abundance for outlier bins  
491 (blue circles) and lowest interquartile range (IQR) value of non-outlier bins (black box, **Figure**  
492 **3B, Additional file 1: Figure S3C**), indicating less bin-to-bin variation in read abundance. Both  
493 EOM and LOM samples exhibited a smaller range of normalized read abundance in outlier bins  
494 than ENM and LNM samples (**Figure 3B, Additional file 1: Figure S3C**). In addition, the read  
495 abundance variation of COM samples was similar to EOM or LOM samples (**Figure 3B,**  
496 **Additional file 1: Figure S4B**). Finally, due to the extremely low coverage of the clinical bulk  
497 sample, the read abundance variation was much higher than all other samples (**Figure 3B,**  
498 **Additional file 1: Figure S4B**).

499  
500 We then calculated the mean coefficient of variation (CV) for read abundance in the different  
501 sample types (**Table 3, Figure 3C, Additional file 2: Table S11**). Following normalization for  
502 coverage, the CV from the ENM sample was significantly higher compared to the CV of each  
503 EOM sample (147% versus a mean of 89%, respectively, pairwise p value < 0.01, **Additional**  
504 **file 2: Table S12**). Similarly, the LNM-CV was significantly higher compared to the CV of each

505 LOM sample (111% versus a mean of 79%, respectively, pairwise p value <0.01, **Additional file**  
506 **2: Table S12**). These data showed improvement in levels of read uniformity across the genome  
507 when using optimized MALBAC over the standard protocol. In support of this finding, the CV  
508 value of COM samples was similar to EOM and LOM samples (**Table 3, Figure 3C**).

509

### 510 **Optimized MALBAC exhibits reproducible coverage of single cell genomes.**

511 To better assess the amplification patterns across the genomes, we compared the distribution of  
512 binned normalized reads from single cell samples to the bulk control using a correlation test (as  
513 performed in other single cell studies [38, 88]). This analysis revealed that amplification patterns  
514 of optimized EOM and LOM samples were slightly correlated with the bulk control (Spearman  
515 correlation coefficient of 0.27 and 0.25, respectively, **Additional file 2: Table S13**), while the  
516 non-optimized samples were not correlated (ENM: 0.05 and LNM: 0.07) (**Figure 4A**). This  
517 result indicated that the parasite genome was better represented by single cell samples amplified  
518 by optimized MALBAC. To quantify the reproducibility of read distribution between single cell  
519 samples amplified by MALBAC, we compared their Spearman correlation coefficients. The read  
520 abundance across all single cell samples was highly correlated; two individual EOM or LOM  
521 samples had a correlation coefficient of 0.83 and 0.88 respectively (**Figure 4B**). When we  
522 expanded our analysis to calculate the correlation of binned normalized reads between all 26  
523 sequenced samples (**Additional file 2: Table S13**) and hierarchically clustered the Spearman  
524 correlation coefficient matrix between these samples, all 23 optimized single cell samples (EOM  
525 and LOM) clustered with a mean Spearman correlation coefficient of 0.84 (**Figure 4C**). In  
526 addition, the two COM samples were correlated with each other (Spearman correlation  
527 coefficient of 0.84) (**Additional file 1: Figure S4C**). This correlation indicated high

528 reproducibility of normalized read distribution across the genomes that were amplified by  
529 optimized MALBAC. Within the large cluster, two LOM samples (LOM12 and LOM13)  
530 displayed the highest correlation (0.94, **Figure 4C**).

531

532 **Reproducible coverage with lower variation is the main benefit of MALBAC over MDA-**  
533 **based amplification of single cell genomes.**

534 We performed a brief comparison between our data and that from a MDA-based study because  
535 this is the only other method that has been used to amplify single *Plasmodium* genomes ([54],  
536 **Additional file 1: Figure S6**). This study sorted individual infected erythrocytes with high (H),  
537 medium (M) and low (L) DNA content corresponding to late, mid, and early stage parasites,  
538 applied MDA-based WGA to single erythrocytes, and sequenced the DNA products. The authors  
539 measured a similar amplification success rate in early (L) stage samples as our study (MDA:  
540 50% by DNA yield, MALBAC: 43% by DNA yield) yet slightly improved success rates for late  
541 (H) stage samples (MDA: 100%, MALBAC: 90%, **Additional file 2: Table S8 and S9**). In light  
542 of experimental differences between the two studies (**Additional file 2: Table S14**), we analyzed  
543 data from the twelve MDA samples using our exact analysis pipeline and parameters (six MDA-  
544 H and three of each MDA-M and -L samples) and confined our comparison of the data to a few  
545 metrics: 1) coefficient of variation of read abundance, 2) coverage breadth, and 3) correlation  
546 between samples (see below).

547

548 While MALBAC-amplified genomes exhibited a consistent amplification pattern (**Additional**  
549 **file 1: Figure S3A and S3B**), the MDA-amplified genomes showed substantially more variation  
550 across cells (**Additional file 1: Figure S6A**). We also detected higher variation in normalized



551 read abundance in the MDA-H samples (compared to MDA-L and -M samples, **Additional file**  
552 **1: Figure S6B**), which was not consistent with the report that the MDA method amplifies high  
553 DNA content better than parasites with lower DNA content [54]. Even though the bulk DNA  
554 controls used in both studies showed similar CVs (24% versus 22%), the MDA-amplified  
555 samples displayed a higher CV than MALBAC-amplified single cell samples regardless of the  
556 parasite stage (a mean of 186% versus 85%, respectively, **Table 3, Additional file 2: Table S11**  
557 **and S15**). Additionally, the correlation between MDA-amplified cells (mean correlation  
558 coefficient: 0.20; **Additional file 2: Table S17, Additional file 1: Figure S6D**) was much lower  
559 than that between our optimized MALBAC-amplified cells (mean correlation coefficient: 0.84;  
560 **Additional file 2: Table S13, Figure 4C**). As expected based on MALBAC's limited coverage  
561 of intergenic regions (**Table 2**), MDA amplified samples displayed a higher coverage breadth  
562 cross the genome, especially in the intergenic regions (**Additional file 2: Table S16**).

563

#### 564 **Copy number variation analysis is achievable in MALBAC-amplified single cell genomes.**

565 To detect CNVs with confidence, we employed both discordant/split read detection and read-  
566 depth based methods with strict parameters. We used LUMPY to detect paired reads that span  
567 CNV breakpoints or have unexpected distances/orientations (requiring a minimum of 2  
568 supporting reads). We also used a single cell CNV analysis tool, Ginkgo, to segment the genome  
569 based on read depth across bins of multiple sizes and determine copy number of segments  
570 (requiring a minimum of 5 consecutive bins). We regarded the CNVs detected by the two  
571 methods the same if one CNV overlapped with at least half of the other CNV and vice versa  
572 (50% reciprocal overlap). Using this approach, we first identified a “true set” of CNVs from the  
573 bulk *Dd2* DNA sample (**Table 4**, 3 CNVs on 3 different chromosomes). One of the true CNVs

574 was identified previously in this parasite line (the large *Pfmdr1* amplification on chromosome 5,  
575 [6]); another true CNV occurs in an area of the genome that is reported to commonly rearrange  
576 in laboratory parasites ([89], the *Pf11-1* amplification of chromosome 10).

577

578 With a set of true CNVs in hand, we assessed our ability to detect these CNVs in the single cell  
579 samples amplified by MALBAC and explored parameters that impacted their detection. As  
580 expected, each CNV detection method exhibited differences in ability to identify the true CNVs,  
581 which is likely due to a number of factors including CNV size, genomic neighborhood, and  
582 sequencing depth [31]. For example, using discordant/split read analysis, we were able to readily  
583 identify the *Pf11-1* amplification in the majority of samples (21 of 25 samples, **Additional file 2:**  
584 **Table S18**). This method was less successful in identifying the *Pfmdr1* amplification (only 3  
585 optimized MALBAC samples in total, **Additional file 2: Table S18**). For read-depth analysis,  
586 the success of true CNV detection was heavily dependent on the bin size (**Additional file 2:**  
587 **Table S18**). If we selected the lowest bin size (1kb) in which it was possible to detect the  
588 smallest of the true CNVs (13kb), we were able to readily identify the *Pfmdr1* amplification in  
589 all samples (**Additional file 2: Table S18**). As we increased the bin size, the number samples  
590 with *Pfmdr1* detection decreased, only optimized MALBAC samples were represented, and the  
591 copy number estimate in single cells approached the bulk control (**Additional file 2: Table S7**  
592 **and S18**). The other two true CNVs were only detected at the 1kb bin size in a minority of  
593 samples (6 total, **Additional file 2: Table S18**).

594

595 When we assessed true CNVs that overlapped between the two methods, we were able to detect  
596 at least one CNV in a total of 5 single cells (3 EOM and 2 LOM samples out of 25 total cells,

597 **Table 5).** In one sample, EOM 23, the *Pfmdr1* amplification was detected in bin sizes of up to  
598 10kb at a copy number similar to the bulk control (~5 copies, **Table 5**). Besides the CNVs  
599 conserved with the *Dd2* bulk sample, we also detected unique CNVs that were only identified in  
600 the single cell samples. In general, most of the CNVs detected by both discordant/split read and  
601 read depth analyses were spread across all but one chromosome (including 1-8, 10-14),  
602 predominantly confined to optimized MALBAC samples, and were only detected at 1kb read  
603 depth bin sizes (**Additional file 2: Table S19**).

604

## 605 **Discussion**

606 This study is the first to optimize the standard MALBAC protocol for single cell sequencing of a  
607 genome with extreme GC-content (*P. falciparum*: 19.4%). We showed that this optimized  
608 method can reliably amplify early stage parasite genomes, which contain <30 femtograms of  
609 DNA per sample. Single cell experiments are innately very sensitive to contaminating DNA from  
610 other organisms and we detected a lower proportion of human and bacteria DNA in MALBAC-  
611 amplified samples, which improved overall coverage of the *P. falciparum* genome. Furthermore,  
612 we showed that this method reduced GC-bias to increase the breadth and uniformity of genome  
613 amplification; these improvements contributed to the detection of true CNVs in single parasite  
614 genomes.

615

## 616 **MALBAC Volume and Cycles**

617 MALBAC amplification has been used in studies of human cells, where each single genome  
618 harbors a picogram level of DNA [27, 50]. In this study, we successfully improved the sensitivity  
619 of the MALBAC method to amplify a femtogram level of DNA from single *P. falciparum*

620 parasites. Reducing the total reaction volume (from 50 $\mu$ l to 20 $\mu$ l) and increasing the number of  
621 amplification cycles (pre-amplification: from 5 to 19-20; exponential: from 15 to 17) was likely  
622 responsible for this improvement in sensitivity. It was essential to combine these two changes;  
623 the lower sample volume and decreased starting material reduced the overall DNA yield and  
624 therefore, we increased the number of amplification cycles to generate enough material for  
625 sequencing. Additional benefits of these modifications included less contaminating DNA  
626 introduced by reagents and reduced costs due to the lower reagent requirement. Importantly,  
627 these simple steps can be applied to the MALBAC amplification of small genomes or genomes  
628 with skewed GC-content from other organisms such as bacteria [90]. For example, studies of  
629 *Mycoplasma capricolum* (GC-poor) [91], *Rickettsia prowasekii* (GC-poor) [92], and *Borrelia*  
630 *burgdorferi* (GC-poor) [93], *Entamoeba histolytica* (GC-poor) [94], *Micrococcus luteus* (GC-  
631 rich) [95] could be improved using this method.

632

### 633 **Primers and Coverage Bias**

634 The modification of the primer was essential for the successful amplification of the AT-rich *P.*  
635 *falciparum* genome. This change was meant to prevent the preferential amplification of GC-rich  
636 sequences as observed for human and rat single cell genomes [38, 60]. We increased coverage  
637 breadth of *P. falciparum* genic regions (a mean of 21.7% GC-content) from as low as <40% to  
638 ~80% (ENM versus EOM and LOM samples, **Table 2**) by specifically altering the base content  
639 of the degenerate 5-mer of MALBAC pre-amplification primer from 50% to 20% GC-content.  
640 The initial priming step is crucial for whole genome amplification and controlling this step can  
641 limit amplification bias [96]. Indeed, 5-mers with ~20% GC-content across the *P. falciparum*  
642 genome are 2- and 6-fold more common than those with 40% and 60% GC-content, respectively

643 **(Additional file 2: Table S1)**. This difference indicated that annealing of the optimized  
644 MALBAC primer based on the degenerate bases was more specific for the parasite's genome  
645 than the standard MALBAC primer. Interestingly, during this study we observed a preferential  
646 amplification of genic over intergenic regions (**Table 2**), which may be explained by lower  
647 percentage of 5-mers with 20% GC-content in intergenic regions than in genic regions  
648 **(Additional file 2: Table S1)**. Furthermore, when we searched for reads that contained the  
649 MALBAC common sequence (see *Methods* and **Additional file 2: Table S5**) to identify WGA  
650 binding sites across the *P. falciparum* genome, we found that binding sites were predominantly  
651 located in the genic regions (**Additional file 2: Table S5**); this result indicated that there was an  
652 issue with primer annealing in intergenic regions, which may be caused by a high predicted rate  
653 of DNA secondary structure formation across these regions of the *P. falciparum* genome [56].  
654 The polymerase used in the MALBAC linear amplification steps (*Bst* large fragment) exhibits  
655 strand displacement activity, which presumably allows resolution of secondary structure [97, 98].  
656 However, a longer extension time may be required for amplification of repetitive DNA sequence,  
657 either during linear or exponential steps.

658

## 659 **Parasite and Contaminating Genomes**

660 The standard MALBAC method is reported to display the most favorable ratio of parasite DNA  
661 amplification over human DNA when compared to other common WGA methods [99]. Our  
662 optimization of MALBAC further improved this ratio. The improved sensitivity of optimized  
663 MALBAC through reducing reaction volume and increasing cycle numbers not only enhanced  
664 the amplification of the small parasite genome, but also improved the sensitivity to amplify  
665 contaminating non-parasite DNA. Nevertheless, when comparing the two MALBAC protocols,

666 the optimized method yielded a greatly reduced proportion of contaminating DNA (ENM and  
667 LNM: 13.6% vs EOM and LOM: 6.9% of total reads, **Figure 2A**). We speculate that this  
668 decrease was once again due to our modification of the GC-content of the degenerate bases of  
669 the primer; this limited the preferential amplification by standard MALBAC of contaminating  
670 DNA with higher GC content, improving the representation of parasite DNA in the overall WGA  
671 product.

672  
673 The major contaminating DNA source that we detected in our samples was from humans (**Figure**  
674 **2A**). This was not surprising given that, in our experimental system, the culture and host  
675 environments are rich in human DNA [86, 87, 100]. It is also possible that human DNA was  
676 introduced during the single cell isolation or WGA steps [59]. The former situation is a larger  
677 issue for clinical parasite isolates due to the abundance of white blood cells that contribute to  
678 extracellular DNA when they decay outside of the host [101]. Indeed, we observed more human  
679 DNA in clinical bulk and single cell samples (an increase of ~11-fold over laboratory-derived  
680 *Dd2* bulk and single cell samples, respectively). The massive level of contamination in the  
681 clinical bulk sample and limited coverage of the parasite genome (0.3%) was exacerbated by 1)  
682 the omission of a leukodepletion step that is routinely employed to limit host cell contamination  
683 [102–104] and 2) the lower overall sequencing output of that particular run (**Additional file 2:**  
684 **Table S4**).

685  
686 The second most common source of contaminating DNA was bacteria (**Figure 2A**). Since this  
687 contaminant was absent in the bulk DNA control and increased in early stage parasite samples  
688 (representing an average of 0.8% of EOM reads compared to 0.2% for LOM samples), we

689 predict that bacterial material was introduced during single cell isolation and WGA steps.

690 Although we took precautions to limit this occurrence (see *Methods*), environmental cells and  
691 DNA could have been introduced during parasite isolation using the open microscopy chamber  
692 of the CellRaft AIR System. In addition, other potential sources include the molecular biology  
693 grade water [105–107] or WGA reagents [108–111]. Reducing the reaction volume could further  
694 reduce this source of contamination.

695

### 696 **Early and Late Stage Parasites**

697 Depending on when a novel CNV arises (i.e. early or late in replication), each parasite stage  
698 holds advantages for its detection. If the CNV arises in the first round of replication and is copied  
699 into most of the genomes of a late stage parasite, having multiple genomes will be advantageous  
700 for detection. If the CNV arises later in replication, it will be present in only few of the genomes;  
701 therefore, averaging across the genomes, as with bulk analysis, will limit its detection. Since only  
702 one haploid genome is present in an early stage parasite, the sensitivity for detecting rare/unique  
703 CNVs within parasite populations will be enhanced in this situation.

704

705 For this reason, staging of parasites in this study was important. We performed stage-specific  
706 enrichment before single cell isolation and confirmed that the majority of parasites were the  
707 desired stage using flow cytometry (see *Methods*, **Additional file 1: Figure S1**, 97% for early  
708 stage enrichment and 74% for late stage enrichment). Furthermore, during selection of cells by  
709 microscopy (before automated collection by the IsoRaft instrument), we confirmed the expected  
710 fluorescence intensities for each stage; early stage parasites had a significantly smaller genome  
711 and mitochondrion size compared to late state (as in **Figure 1B**). However, differences in

712 preparation of samples may have impacted our parasite stage comparisons. While all late stage  
713 samples were isolated, lysed and amplified in the same batch under the same conditions, early  
714 stage samples processed in three separate batches (**Additional file 2: Table S11**). Despite  
715 conserved methods and good concordance in CV between all samples (**Additional file 2: Table**  
716 **S11**), minor differences could have contributed to variations in the amplification steps.

717

718 Differences in our genome analysis results from optimized MALBAC samples provided further  
719 confidence that the parasites were of the expected stage. Firstly, late stage parasites showed a  
720 higher WGA success rate than early stage parasites (90% versus 43%, **Additional file 2: Table**  
721 **S9**). This result was explained simply by the presence of extra genomes in the late stage samples  
722 (~16n versus 1n) and was consistent with a previous study that used MDA-based amplification  
723 methods [54]. Late stage parasites also displayed better uniformity of read abundance (**Table 3**),  
724 indicating less amplification bias because fewer regions were missed when more genomes were  
725 present. Additionally, there were fewer contaminating reads found in late stage parasites than  
726 early stage parasites overall (5.1% versus 8.6%). Once again, this was likely due to a higher ratio  
727 of parasite DNA to contaminating DNA in the late stage samples.

728

729 Despite these differences, we observed similar coverage breadth and Spearman correlation  
730 coefficients of read abundance for both early and late stage MALBAC-amplified parasites  
731 (**Table 2 and Additional file 2: Table S13**). This was contrary to the MDA study in single *P.*  
732 *falciparum* parasites that found a higher breadth of genome coverage from the late stage parasites  
733 [54]. Our findings confirmed that the pattern of amplification across the genome was determined  
734 by the binding of the optimized MALBAC primers and not the parasite developmental form.



735

## 736 **Amplification Reproducibility and CNV Analysis**

737 The high level of amplification reproducibility (i.e. the same regions are over- and under-  
738 amplified across multiple genomes), that we and others have observed with MALBAC, is  
739 especially advantageous for CNV detection because amplification bias can be normalized across  
740 cells (as has been successfully performed for human cells [27, 112]). However, cross-sample  
741 normalization is not possible in our study due to the use of a single laboratory parasite line that  
742 includes known CNVs (*Dd2*). Instead, we lowered our false positive rate by combining a read-  
743 depth based tool (Ginkgo) with a split/discordant read-based method (LUMPY) to detect CNVs  
744 in our single cell samples. Using this approach, we identified at least one true CNV in a minority  
745 of single cell genomes (*Pfmdr1* or *Pf11.1* amplifications were detected in 5 of 25 samples, **Table**  
746 **5**). However, for read-depth analysis, these calls were confined to the 1kb bin size; this  
747 observation may be explained by a number of possibilities, including those that are both  
748 biological and artifacts of our methods. For example, the parameters of Ginkgo may be limiting  
749 CNV detection at larger bin sizes (requires a minimum 5 bins to call a CNV) or because random  
750 noise is higher at this bin size, the false positive rate is higher and therefore the random chance  
751 for overlap with LUMPY calls is increased. From a biological perspective, however, there may  
752 be an abundance of small CNVs as has been observed by genomic studies on this parasite [22].  
753 Ultimately, additional validation with larger sample sizes will be required to determine the  
754 answer.

755

756 Importantly, as we increased the bin size, the uniformity of read count improves (**Figure S5**) and  
757 impacts our ability to identify CNVs (i.e. the *Pfmdr1* amplification is found in fewer single cell

758 genomes and the copy number estimate approaches that of the bulk control, **Table S18 and S7**).  
759 Thus, we assert that we can accurately detect relatively large CNVs (>50kb) in single parasite  
760 samples using larger bin sizes ( $\geq 10$ kb). This is an advancement in single cell genomics for two  
761 reasons: 1) we have identified a ~82kb CNV in single cell genomes that is below the current  
762 resolution of CNV detection from single cell genomes amplified with common WGA methods  
763 (hundreds of kb to Mb) [27, 28, 46, 51, 60, 113–115] and 2) our sensitivity for CNV detection  
764 will improve greatly when we add cross-sample normalization to our analysis pipeline. This step  
765 will be possible when we expand our studies in number and parasite diversity; the inclusion of  
766 parasite lines with different CNV profiles along the genome will greatly facilitate the removal of  
767 reproducible amplification bias and increase the reproducible detection of conserved and unique  
768 CNVs of all sizes.

769

### 770 **Limitations, Scope, and Future Efforts**

771 One limitation in our comparison between standard and optimized MALBAC-amplified samples  
772 was the sequencing of only a single standard MALBAC sample from each parasite stage.  
773 However, we evaluated a total of 7 independent non-optimized samples (3 ENM and 4 LNM)  
774 and detected multiple instances of allelic dropout, could not calculate the uniformity score for 4  
775 of 7 samples, and detected heavy skewing of the copy number of a known CNV (**Table 1 and**  
776 **Additional file 2: Table S10**). These results indicated biased coverage and high levels of  
777 contaminating DNA in these samples, which made sequencing of these samples futile.

778

779 Additionally, since our goal in this study was to evaluate amplification bias, we did not perform  
780 SNP analysis on samples to address accuracy of the MALBAC method. Other studies showed

781 that the WGA-induced single nucleotide error rate with MALBAC was higher than that for MDA  
782 [27, 59, 116]. This was likely due to the use of error-prone large fragment *Bst* polymerase in  
783 MALBAC pre-amplification cycles compared to the use of phi29 DNA polymerase with  
784 proofreading activity in MDA.

785

786 While it is notable that we can successfully amplify a small, base-skewed genome and generate  
787 coverage levels that allow the detection of relatively small CNVs on a single cell level, we  
788 recognize that improvements can be made to our CNV analysis pipeline. As mentioned above,  
789 future studies will include the use of cross-sample normalization to increase our accuracy of  
790 CNV detection. Additionally, it will be important to further explore the genomic features  
791 associated with amplification bias; for example, the annealing location of common sequences of  
792 MALBAC primers and the location of secondary structure in the *P. falciparum* genome could  
793 impact amplification steps [117]. In this case, if associations are identified, we can further  
794 normalize for these features in a similar manner as we currently do so for GC content difference  
795 across bins. Any improvements in the coverage of intergenic regions and uniformity will also  
796 impact CNV identification through increased detection of discordant/split reads and more  
797 accurate read-depth calling in these regions.

798

## 799 **Conclusions**

800 Our modifications of reaction volume, cycle number, and GC-content of degenerate primers will  
801 expand the use of MALBAC-based approaches to organisms not previously accessible because  
802 of small genome size or skewed base content. Furthermore, these changes can reduce  
803 amplification of undesired contaminating genomes in a sample. The reproducible nature of this

804 WGA method, combined with new genome analysis tools, will reduce the effect of amplification  
805 bias when conducting large scale single cell analysis and enhance our ability to explore genetic  
806 heterogeneity. Thus, we expect this approach to broadly improve study of mechanisms of genetic  
807 adaptation in a variety of organisms.

808

### 809 **List of abbreviations**

810 MALBAC: Multiple annealing and looping-based amplification cycling

811 CNVs: Copy number variations

812 WGA: Whole genome amplification

813 MDA: Multiple displacement amplification

814 *PfMDR1*: *Plasmodium falciparum* multidrug resistance 1

815 ddPCR: Droplet digital PCR

816 NA: Not applicable

817 SD: Standard deviation

818 EOM: Early stage single parasites amplified by optimized MALBAC

819 LOM: Late stage single parasites amplified by optimized MALBAC

820 COM: Clinical single parasites amplified by optimized MALBAC

821 ENM: Early stage single parasites amplified by non-optimized MALBAC

822 LNM: Late stage single parasites amplified by non-optimized MALBAC

823 IQR: Interquartile range

824 CV: Coefficient of variation

825 SLOPE: Streptolysin-O Percoll

826

827 **Declarations**

828 **Ethical Approval and Wavier for Informed Consent**

829 The University of Virginia Institutional Review Board for Health Sciences Research provided  
830 ethical approval for clinical samples used in this study (IRB-HSR protocol #21081). We handled  
831 all samples in accordance with approved protocols and in agreement with ethical standards of the  
832 Declaration of Helsinki. The University of Virginia Institutional Review Board for Health  
833 Sciences Research provided a wavier for informed consent because our study design met the  
834 following criteria: the research involved minimal risk to subjects, the waiver does not adversely  
835 affect the rights and welfare of subjects, and the research could not practicably be carried out  
836 without the waiver.

837

838 **Availability of data and materials**

839 The raw sequence files generated and analyzed during the current study are available in the  
840 Sequence Read Archive (SRA) under the BioProject ID PRJNA607987, BioSamples  
841 SAMN14159290-SAMN14159318. The datasets for the uniformity and reproducibility analysis  
842 of MDA-based amplification on parasite DNA from single infected erythrocytes are available in  
843 the NCBI short read archive under the accession PRJNA385321[54].

844

845 **Competing interests**

846 The authors declare that they have no competing interests.

847

848 **Funding**

849 Research reported in this publication was supported by the University of Virginia 3Cavaliers  
850 Grant (to JLG and CCM), University of Virginia Global Infectious Disease Institute iGrant (to  
851 SL), the McDonnell Fellowship (IEB), FONDECYT Regular #1191737 (IEB), and the NIAID of  
852 the National Institutes of Health under award number NIH 7R21AI111072 (IEB). These funding  
853 agencies were not involved in the experimental design, analysis and interpretation of the data, or  
854 writing of the manuscript. The content is solely the responsibility of the authors and does not  
855 necessarily represent the official views of the National Institutes of Health.

856

### 857 **Authors' contributions**

858 MJM and JLG conceived of the project. SL, ACH, and JLG designed the experiments. IB and  
859 MJM provided access to essential protocols and equipment (CellRaft AIR System) at the start of  
860 the project. ACB and CCM procured and processed clinical samples from the University of  
861 Virginia Medical Center. SL conducted all of the experiments. SL analyzed the data, with  
862 support from ACH and JLG. SL and JLG wrote the manuscript. ACH, ACB, CCM, IB, and  
863 MJM edited the manuscript. All authors critically reviewed and approved the manuscript.

864

### 865 **Acknowledgements**

866 Our thanks to Michelle Warthan for parasite culturing support, AnhThu Nguyen (Biology  
867 Genomics Core, University of Virginia) for sequencing support, and all members of Dr. Jennifer  
868 Guler's laboratory, as well as the laboratories of Dr. William Petri Jr and Barbara Mann at  
869 University of Virginia, for their helpful discussion and insight.

870

871

872 **Figures**

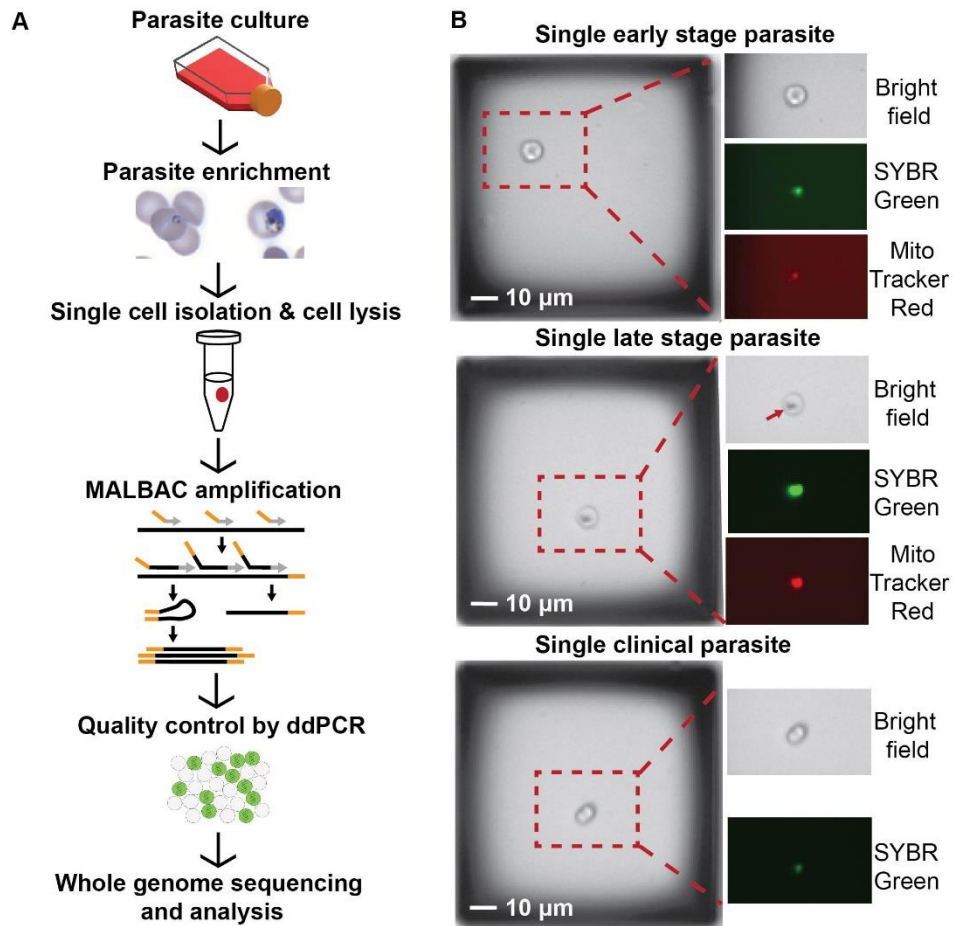

873

874 **Figure 1. Single *P. falciparum*-infected erythrocytes are isolated, amplified, and sequenced.**

875 **A. Experimental workflow.** Parasites are grown *in vitro* in human erythrocytes or isolated from  
876 infected patients. In order to limit the number of uninfected erythrocytes in the sample, infected  
877 cells are enriched using column and gradient-based methods (see *Methods*). Individual early-  
878 stage (left image) and late-stage (right image) parasite-infected erythrocytes were automatically  
879 isolated into PCR tubes using the CellRaft AIR System (Cell Microsystems, see panel B). All  
880 cells were lysed by combining a freeze–thaw step with detergent treatment prior to MALBAC  
881 amplification. MALBAC uses a combination of common (orange) and degenerate (grey) primers  
882 to amplify the genome. The quality of amplified genomes was assessed prior to library

883 preparation and sequencing using droplet digital (dd) PCR; DNA is partitioned into individual  
884 droplets to accurately measure gene copies. Suitable samples were Illumina sequenced and  
885 analyzed as detailed in **Additional file 1: Figure S2. B. Parasite stage visualization on the**  
886 **CellRaft AIR System using microscopy** (10X magnification). Enriched early and late stage  
887 parasite-infected erythrocytes at low density were seeded into microwells to yield only a single  
888 cell per well (left image of each group), and identified with SYBR green and Mitotracker Red  
889 staining (indicates parasite DNA and mitochondrion, respectively). Early stage parasites  
890 exhibited lower fluorescence due to their smaller size and late stage parasites had noticeable dark  
891 spots (arrow) due to the accumulation of hemozoin pigment. Scale bar represents 10 $\mu$ m.  
892



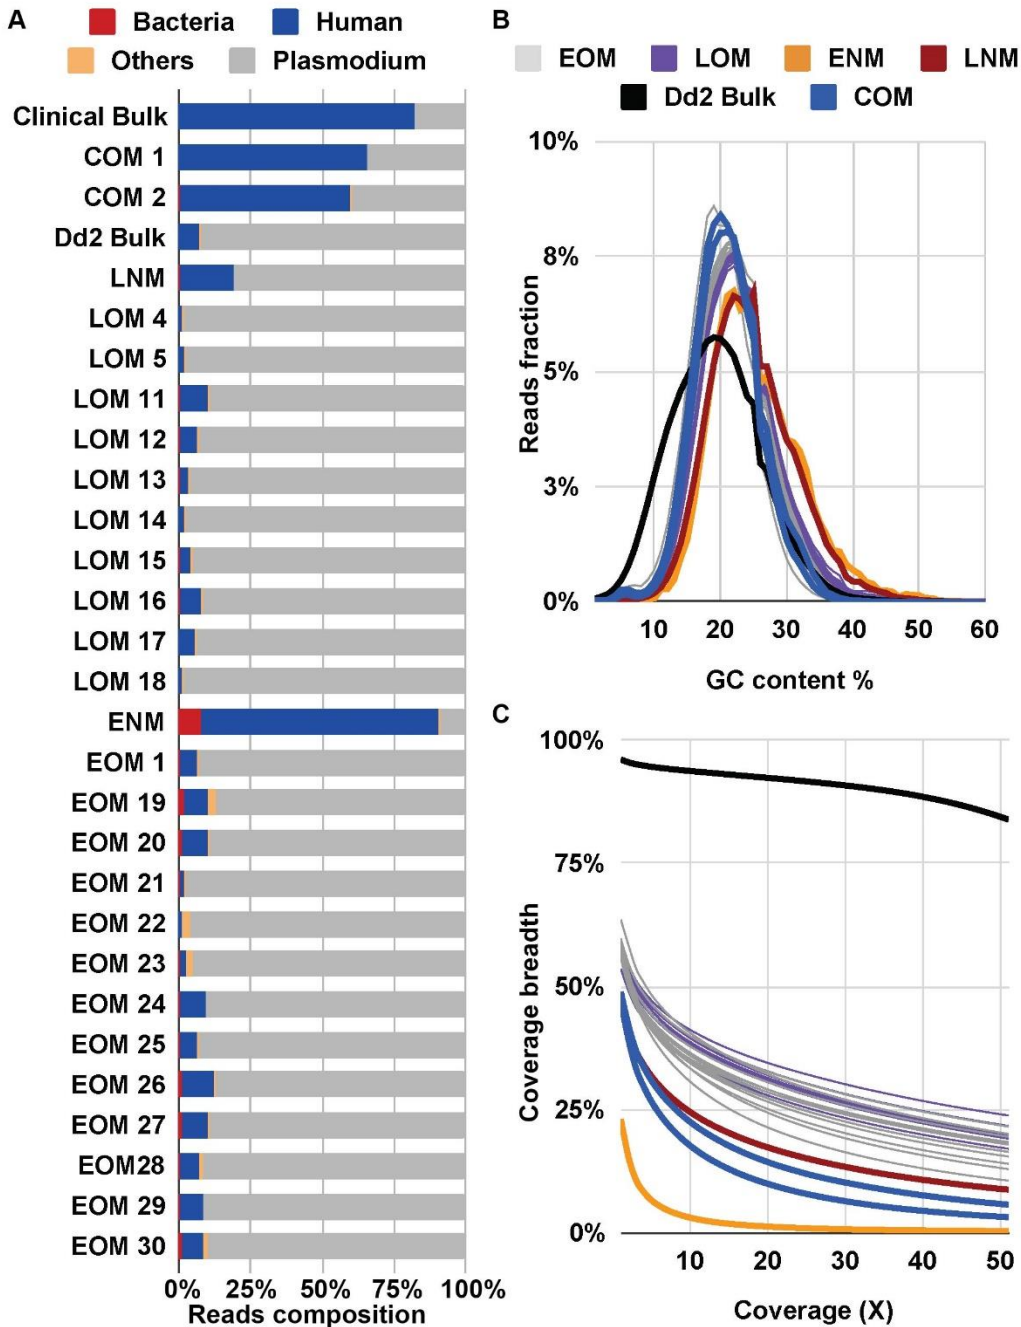

893

894 **Figure 2. Sequencing statistics show benefits of optimized MALBAC. A. Contribution of**

895 **reads based on organism type.** A subset of 10,000 reads from each sample were randomly

896 selected for BLAST to identify sources of DNA. Color representation: bacteria (red); human

897 (blue); other organisms (orange); *Plasmodium* (grey). **B. GC-content of *P. falciparum* mapped**

898 **reads.** GC-content of reads was calculated by Qualimap with default parameters. Color

899 representation: EOM (grey): Early stage single parasites amplified by optimized MALBAC;  
900 LOM (purple): Late stage single parasites amplified by optimized MALBAC; ENM (orange):  
901 Early stage single parasites amplified by non-optimized MALBAC; LNM (dark red): Late stage  
902 single parasites amplified by non-optimized MALBAC; *Dd2* bulk genomic DNA (black); COM  
903 samples (blue): Clinical single parasites amplified by optimized MALBAC. Clinical Bulk  
904 genomic DNA is not shown here due to <1% of the genome being covered by at least one read.  
905 **C. Fraction of *P. falciparum* genome covered by >1 read.** The fraction of the genome was  
906 calculated by Qualimap with default parameters. Color representations are the same as described  
907 in panel B.  
908

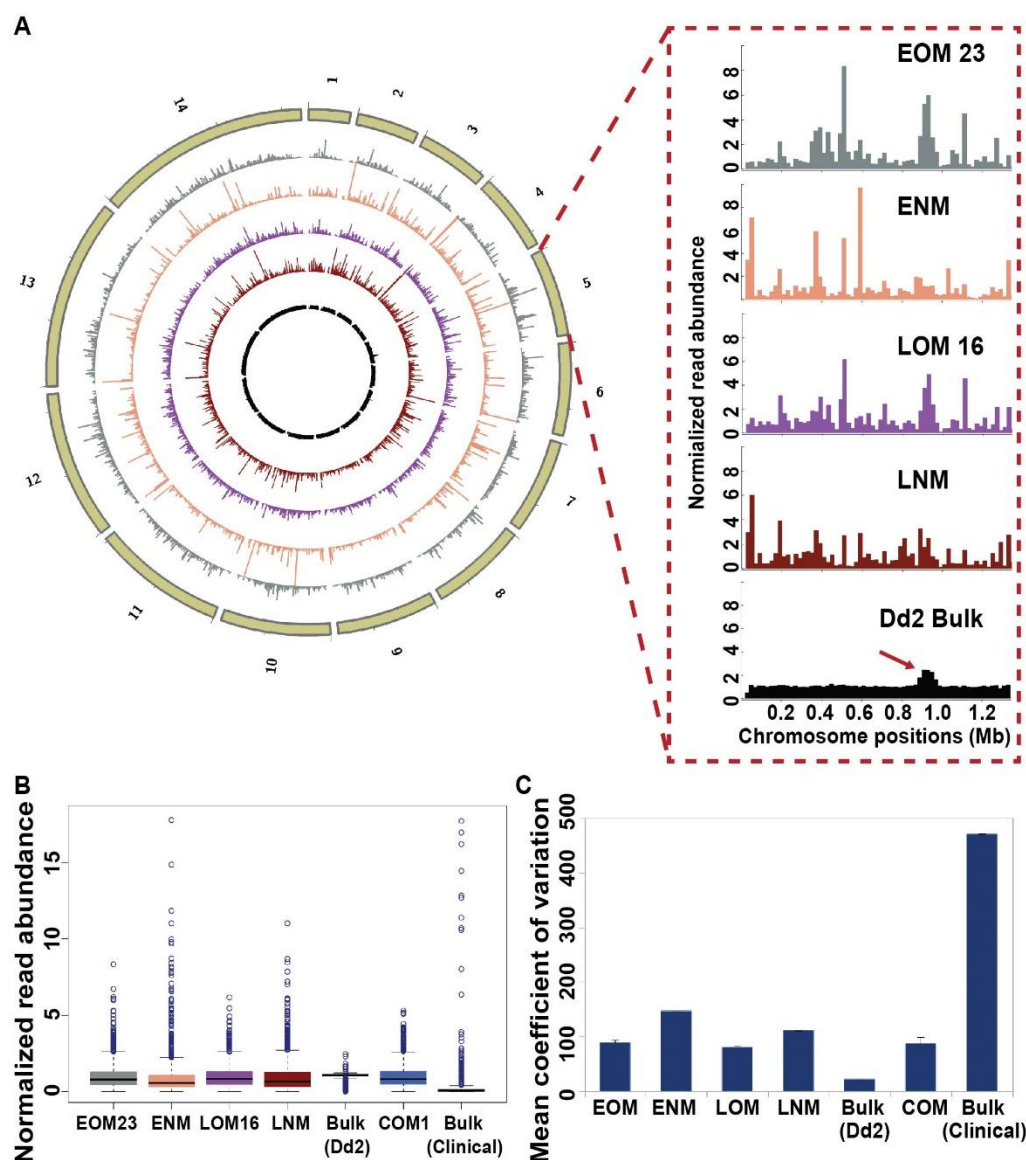

909

910 **Figure 3. Samples amplified by optimized MALBAC display improved uniformity of read**

911 **abundance. A. Normalized read abundance across the genome.** The reference genome was

912 divided into 20kb bins and read counts in each bin were normalized by the mean read count in

913 each sample. The circles of the plot represent (from outside to inside): chromosomes 1 to 14

914 (tan); one EOM sample (#23, grey); one ENM sample (#3, orange); one LOM sample (#16,

915 purple); one LNM sample (#2, dark red); *Dd2* bulk genomic DNA (black). The zoomed panel

916 shows the read distribution across chromosome 5, which contains a known CNV (*Pfmdr1*

917 amplification, arrow on *Dd2* bulk sample). **B. Distribution of normalized read abundance**  
918 **values for all bins.** The boxes were drawn from Q1 (25<sup>th</sup> percentiles) to Q3 (75<sup>th</sup> percentiles)  
919 with a horizontal line drawn in the middle to denote the median of normalized read abundance  
920 for each sample. Outliers, above the highest point of the upper whisker ( $Q3 + 1.5 \times IQR$ ) or below  
921 the lowest point of the lower whisker ( $Q1 - 1.5 \times IQR$ ), are depicted with circles. One sample from  
922 each type is represented (see all samples in **Additional file 1: Figure S3C**). **C. Coefficient of**  
923 **variation of normalized read abundance.** The average and SD (error bars) coefficient of  
924 variation for all samples from each type is represented (EOM: 13 samples; ENM: 1 sample;  
925 LOM: 10 samples; LNM: 1 sample; *Dd2* Bulk: 1 sample; COM: 2 samples; Clinical Bulk: 1  
926 sample). See *Methods* for calculation.

927

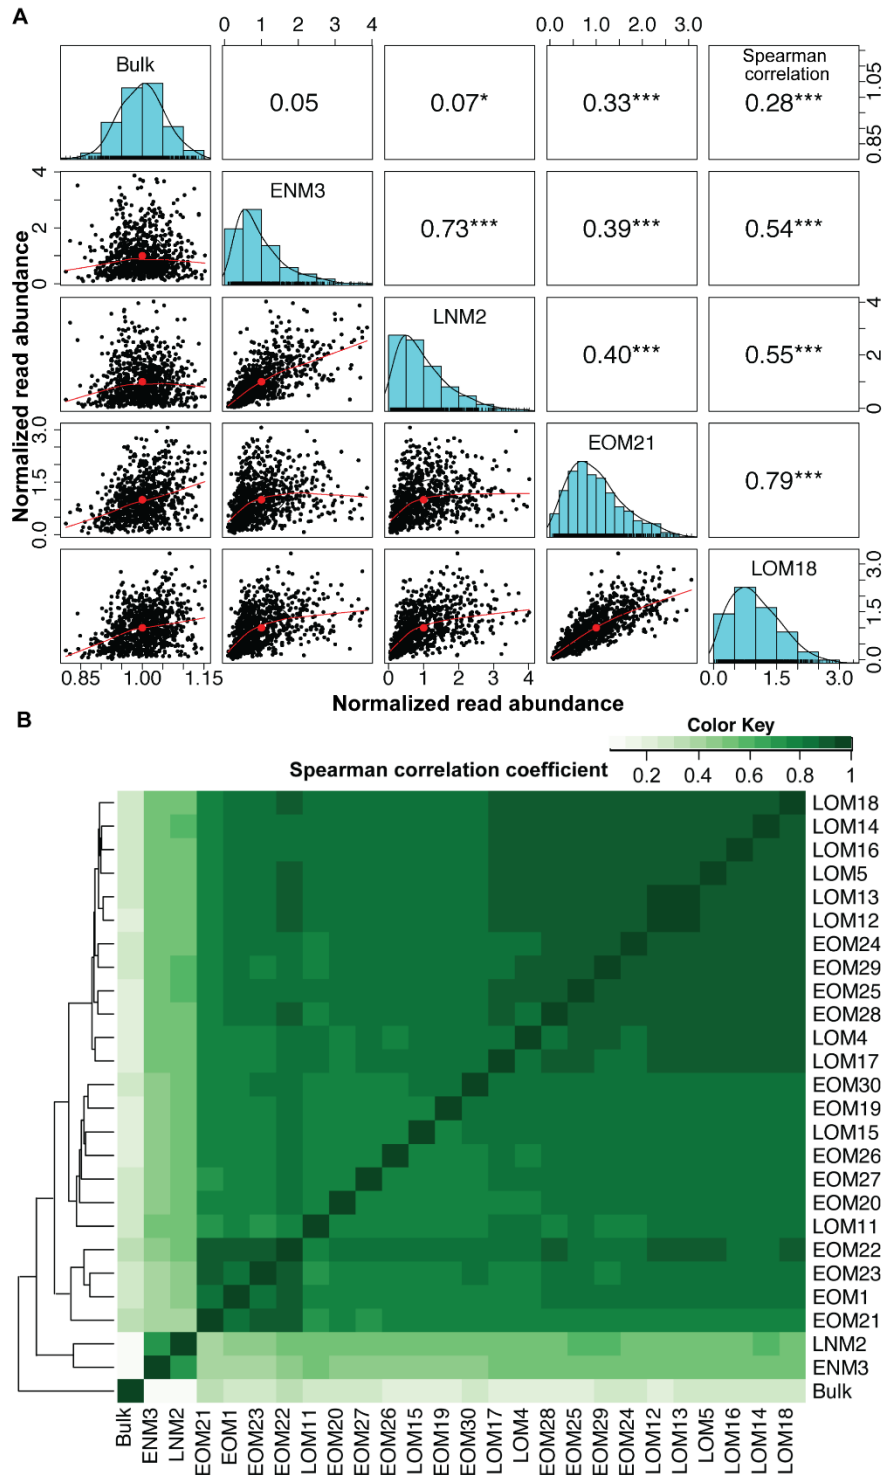

928

929 **Figure 4. Correlations show reproducibility of amplification pattern by optimized**

930 **MALBAC. A. Paired panels for 5X5 matrices represent Spearman correlation, histogram and**

931 **pairwise scatterplot among the normalized read abundance of the *Dd2* Bulk, ENM, LNM, and**

932 one of each EOM and LOM samples. Outlier bins were removed prior to this analysis (see  
 933 *Methods* for outlier identification). The Spearman correlation coefficients of each pair are listed  
 934 above the diagonal, and stars indicate the p-value at levels of 0.1 (no star), 0.05 (\*), 0.01 (\*\*),  
 935 and 0.001 (\*\*\*). The histograms on the diagonal shows the distribution of normalized read  
 936 abundance in each sample. The bivariate scatter plots, below the diagonal, depict the fitted line  
 937 through locally smoothed regression and correlation ellipses (an ellipse around the mean with the  
 938 axis length reflecting one standard deviation of the x and y variables). **B. Spearman correlation**  
 939 **coefficients between sequenced samples.** The hierarchical clustering heatmap was generated  
 940 using Spearman correlation coefficients of normalized read abundance. The color scale indicates  
 941 the degree of correlation (white, correlation= 0; green, correlation > 0).

942

## 943 Tables

944 **Table 1. Pre-sequencing quality control by droplet digital PCR**

| Result        | Sample type | MALBAC type   | Sample name (#)   | Pre-sequencing ddPCR assessment |                    |
|---------------|-------------|---------------|-------------------|---------------------------------|--------------------|
|               |             |               |                   | Uniformity score AVG (SD)*      | PfMDR1 CN AVG (SD) |
| Sequenced     | Single cell | Optimized     | EOM (13)          | 248 (202)                       | 2.6 (0.8)          |
|               |             |               | LOM (10)          | 118 (69)                        | 2.2 (1.3)          |
|               |             |               | COM (2)           | 369 (-)                         | 1.9 (0.8)          |
|               |             | Non-optimized | ENM (1)           | 18519 (-)                       | 0.2 (-)            |
|               |             |               | LNM (1)           | 13121 (-)                       | 0.1 (-)            |
|               | Bulk        | N/A           | Dd2_Bulk (1)      | 30                              | 2.7                |
|               |             |               | Clinical_Bulk (1) | -                               | -                  |
| Not Sequenced | Single cell | Optimized     | EOM (4)           | 1012 (195)                      | 3.7 (3.9)          |
|               |             |               | LOM (4)           | 775 (683)                       | 2.8 (2.1)          |
|               |             |               | COM (2)           | -^ (-)                          | 4.7 (6.6)          |
|               |             | Non-optimized | ENM (2)           | 13689 (-)                       | 0 (-)              |
|               |             |               | LNM (3)           | 1578 (-)                        | 0.1 (0.1)          |

945 EOM: Early stage single parasites amplified by optimized MALBAC; LOM: Late stage single parasites  
 946 amplified by optimized MALBAC; COM: Clinical single parasites amplified by optimized MALBAC;  
 947 ENM: Early stage single parasites amplified by non-optimized MALBAC; LNM: Late stage single  
 948 parasites amplified by non-optimized MALBAC.

949 \*Uniformity scores were calculated when all of the six genes were detected by ddPCR in the sample.

950 ^Due to the lack of ddPCR detection of some genes in COM samples, the uniformity score could not be  
 951 calculated. AVG: average; SD: standard deviation. (-) Indicates only one sample was included in the  
 952 calculation.

953

954 **Table 2. Average GC-content and coverage breadth of sequenced samples**

| Reads              | Sample name (#)      | Average of mean coverage (X) | Average GC content | Average coverage breadth |               |                    |
|--------------------|----------------------|------------------------------|--------------------|--------------------------|---------------|--------------------|
|                    |                      |                              |                    | Whole genome             | Genic regions | Intergenic regions |
| All mappable reads | EOM (13)             | 37.54                        | 21.4%              | 57.9%                    | 78.0%         | 27.8%              |
|                    | LOM (10)             | 43.10                        | 22.4%              | 57.3%                    | 79.0%         | 25.0%              |
|                    | COM (2)              | 9.54                         | 20.7%              | 48.0%                    | 67.7%         | 18.5%              |
|                    | ENM (1)              | 1.47                         | 25.0%              | 23.0%                    | 34.4%         | 6.1%               |
|                    | LNM (1)              | 20.43                        | 24.3%              | 47.4%                    | 67.9%         | 16.9%              |
|                    | <i>Dd2</i> _Bulk (1) | 75.83                        | 18.9%              | 96.1%                    | 97.0%         | 94.9%              |
|                    | Clinical_Bulk (1)    | 0.03                         | 19.7%              | 0.3%                     | 0.3%          | 0.2%               |
| Down-sampled*      | EOM (13)             | 1.66                         | 21.4%              | 30.9%                    | 47.2%         | 6.7%               |
|                    | LOM (10)             | 1.69                         | 22.4%              | 32.1%                    | 49.8%         | 5.8%               |
|                    | COM (2)              | 1.66                         | 20.8%              | 31.1%                    | 47.0%         | 7.5%               |
|                    | ENM (1)              | 1.33                         | 25.2%              | 21.7%                    | 32.9%         | 5.0%               |
|                    | LNM (1)              | 1.62                         | 24.3%              | 26.2%                    | 40.3%         | 5.1%               |
|                    | <i>Dd2</i> _Bulk (1) | 1.85                         | 18.8%              | 76.8%                    | 80.6%         | 71.2%              |

955 \*Down-sampling is to 300,000 mappable reads (Reformat in the BMap package) based on the  
 956 sample with the lowest number of mappable reads (ENM).

957

958 **Table 3. Coefficient variation of normalized read abundance in each sample type**

| Sample name         | Mean Coefficient of Variation (CV) | SD |
|---------------------|------------------------------------|----|
| <i>Dd2</i> Bulk (1) | 22                                 | -  |

|                   |     |    |
|-------------------|-----|----|
| ENM (1)           | 147 | -  |
| EOM (13)          | 89  | 4  |
| LNM (1)           | 111 | -  |
| LOM (10)          | 79  | 2  |
| COM (2)           | 87  | 12 |
| Clinical Bulk (1) | 472 | -  |

959 SD, standard deviation.

960

961 **Table 4. True CNVs detected in the *Dd2* bulk genome**

| Name          | Chr. | Start Pos. | Size (bp) | Type | Support read*   |            | Start Pos. | Size (bp) | Copy number detected by Ginkgo** in different bin sizes |     |     |      | Mappability^ |
|---------------|------|------------|-----------|------|-----------------|------------|------------|-----------|---------------------------------------------------------|-----|-----|------|--------------|
|               |      |            |           |      | Discordant read | Split read |            |           | 1kb                                                     | 5kb | 8kb | 10kb |              |
| <i>Pfmdr1</i> | 5    | 888316     | 81935     | DUP  | 53              | 0          | 888000     | 82000     | 2                                                       | 2   | Nd  | Nd   | 1            |
| <i>Pf11-1</i> | 10   | 1524527    | 18472     | DUP  | 29              | 1          | 1520000    | 28000     | 4                                                       | 5   | NA  | NA   | 0.86         |
| <i>Pf332</i>  | 11   | 1956623    | 8719      | DUP  | 0               | 8          | 1953000    | 13000     | 4                                                       | NA  | NA  | NA   | 0.92         |

962 \*Detected by LUMPY based on discordant/split read detection, minimum number of supporting  
963 reads is 2.

964 \*\*For Ginkgo analysis, the minimum bin number of segmentation is 5.

965 ^For comparison, the mean mappability of the core genome is 0.99 and the mean mappability  
966 telomere/subtelomere regions including *var* gene clusters is 0.65.

967 DUP, duplication; NA, not applicable because the target CNVs will not be detected as the bin  
968 size ( $\geq 5 \times$  bin size) is larger than the size of the target CNVs. Nd, not detected.

969

970 **Table 5. True CNVs detected in single cells**

| Sample name | CNV name      | Start Pos. | Size (bp) | Support read    |            | Start Pos. | Size (bp) | Copy number detected by Ginkgo in different bin sizes |     |     |      |
|-------------|---------------|------------|-----------|-----------------|------------|------------|-----------|-------------------------------------------------------|-----|-----|------|
|             |               |            |           | Discordant read | Split read |            |           | 1kb                                                   | 5kb | 8kb | 10kb |
| LOM 5       | <i>Pfmdr1</i> | 891390     | 34069     | 0               | 2          | 907000     | 28000     | 9                                                     | -   | N/A | N/A  |
| LOM 16      | <i>Pf11-1</i> | 1542335    | 3836      | 0               | 3          | 1543000    | 5000      | 3                                                     | N/A | N/A | N/A  |



|        |               |         |       |   |   |         |       |   |     |     |     |
|--------|---------------|---------|-------|---|---|---------|-------|---|-----|-----|-----|
| EOM 23 | <i>Pfmdr1</i> | 889899  | 79890 | 3 | 3 | 888000  | 82000 | 4 | 6   | 5   | 5   |
| EOM 26 | <i>Pf11-1</i> | 1542335 | 3836  | 0 | 5 | 1543000 | 5000  | 4 | N/A | N/A | N/A |
| EOM 29 | <i>Pf11-1</i> | 1539158 | 5639  | 4 | 0 | 1541000 | 7000  | 3 | N/A | N/A | N/A |

971 "N/A" indicates the target CNVs will not be detected as the bin size ( $\geq 5$  bin size) is larger than the size of the  
972 target CNVs.

973 "-" indicates the target CNVs are not detected in the specified bin size.

974

## 975 **References**

1. Rich SM, Leendertz FH, Xu G, LeBreton M, Djoko CF, Aminake MN, et al. The origin of malignant malaria. *Proc Natl Acad Sci U S A*. 2009;106:14902–7.
2. Matthews H, Duffy CW, Merrick CJ. Checks and balances? DNA replication and the cell cycle in *Plasmodium*. *Parasites & Vectors*. 2018;11:216.
3. Blasco B, Leroy D, Fidock DA. Antimalarial drug resistance: linking *Plasmodium falciparum* parasite biology to the clinic. *Nature medicine*. 2017;23:917–28.
4. Bopp SER, Manary MJ, Bright AT, Johnston GL, Dharia NV, Luna FL, et al. Mitotic Evolution of *Plasmodium falciparum* Shows a Stable Core Genome but Recombination in Antigen Families. *PLOS Genetics*. 2013;9:e1003293.
5. Cheeseman IH, Gomez-Escobar N, Carret CK, Ivens A, Stewart LB, Tetteh KKA, et al. Gene copy number variation throughout the *Plasmodium falciparum* genome. *BMC Genomics*. 2009;10:353–353.
6. Cowman AF, Galatis D, Thompson JK. Selection for mefloquine resistance in *Plasmodium falciparum* is linked to amplification of the *pfmdr1* gene and cross-resistance to halofantrine and quinine. *Proc Natl Acad Sci U S A*. 1994;91:1143–7.
7. Guler JL, Freeman DL, Ahyong V, Patrapuvich R, White J, Gujjar R, et al. Asexual Populations of the Human Malaria Parasite, *Plasmodium falciparum*, Use a Two-Step Genomic

Strategy to Acquire Accurate, Beneficial DNA Amplifications. PLOS Pathogens.

2013;9:e1003375.

8. Kidgell C, Volkman SK, Daily J, Borevitz JO, Plouffe D, Zhou Y, et al. A systematic map of genetic variation in *Plasmodium falciparum*. PLoS pathogens. 2006;2:e57–e57.

9. Nair S, Miller B, Barends M, Jaidee A, Patel J, Mayxay M, et al. Adaptive Copy Number Evolution in Malaria Parasites. PLOS Genetics. 2008;4:e1000243.

10. Price RN, Uhlemann A-C, Brockman A, McGready R, Ashley E, Phaipun L, et al.

Mefloquine resistance in *Plasmodium falciparum* and increased pfmdr1 gene copy number.

Lancet. 2004;364:438–47.

11. Rottmann M, McNamara C, Yeung BKS, Lee MCS, Zou B, Russell B, et al. Spiroindolones, a potent compound class for the treatment of malaria. Science. 2010;329:1175–80.

12. Sidhu ABS, Uhlemann A-C, Fidock DA, Valderramos J-C, Krishna S, Valderramos SG.

Decreasing pfmdr1 Copy Number in *Plasmodium falciparum* Malaria Heightens Susceptibility to

Mefloquine, Lumefantrine, Halofantrine, Quinine, and Artemisinin. The Journal of Infectious

Diseases. 2006;194:528–35.

13. Singh A, Rosenthal PJ. Selection of Cysteine Protease Inhibitor-resistant Malaria Parasites Is Accompanied by Amplification of Falcipain Genes and Alteration in Inhibitor Transport. Journal

of Biological Chemistry. 2004;279:35236–41.

14. Triglia T, Foote SJ, Kemp DJ, Cowman AF. Amplification of the multidrug resistance gene

pfmdr1 in *Plasmodium falciparum* has arisen as multiple independent events. Mol Cell Biol.

1991;11:5244–50.

15. Ribacke U, Mok BW, Wirta V, Normark J, Lundeberg J, Kironde F, et al. Genome wide gene amplifications and deletions in *Plasmodium falciparum*. *Molecular and Biochemical Parasitology*. 2007;155:33–44.
16. Hendrickson H, Slechta ES, Bergthorsson U, Andersson DI, Roth JR. Amplification–mutagenesis: Evidence that “directed” adaptive mutation and general hypermutability result from growth with a selected gene amplification. *Proc Natl Acad Sci USA*. 2002;99:2164.
17. Roth JR, Andersson DI. Amplification–mutagenesis—how growth under selection contributes to the origin of genetic diversity and explains the phenomenon of adaptive mutation. *Research in Microbiology*. 2004;155:342–51.
18. Elde NC, Child SJ, Eickbush MT, Kitzman JO, Rogers KS, Shendure J, et al. Poxviruses Deploy Genomic Accordions to Adapt Rapidly against Host Antiviral Defenses. *Cell*. 2012;150:831–41.
19. Anderson TJC, Patel J, Ferdig MT. Gene copy number and malaria biology. *Trends in Parasitology*. 2009;25:336–43.
20. Ravenhall M, Benavente ED, Sutherland CJ, Baker DA, Campino S, Clark TG. An analysis of large structural variation in global *Plasmodium falciparum* isolates identifies a novel duplication of the chloroquine resistance associated gene. *Sci Rep*. 2019;9:8287–8287.
21. Heinberg A, Siu E, Stern C, Lawrence EA, Ferdig MT, Deitsch KW, et al. Direct evidence for the adaptive role of copy number variation on antifolate susceptibility in *Plasmodium falciparum*. *Molecular microbiology*. 2013;88:702–12.
22. Cheeseman IH, Miller B, Tan JC, Tan A, Nair S, Nkhoma SC, et al. Population Structure Shapes Copy Number Variation in Malaria Parasites. *Molecular biology and evolution*. 2016;33:603–20.

23. Kalisky T, Quake SR. Single-cell genomics. *Nature Methods*. 2011;8:311–4.
24. Kalisky T, Blainey P, Quake SR. Genomic analysis at the single-cell level. *Annu Rev Genet*. 2011;45:431–45.
25. Lauer S, Avecilla G, Spealman P, Sethia G, Brandt N, Levy SF, et al. Single-cell copy number variant detection reveals the dynamics and diversity of adaptation. *PLOS Biology*. 2018;16:e3000069.
26. Zhang L, Vijg J. Somatic Mutagenesis in Mammals and Its Implications for Human Disease and Aging. *Annu Rev Genet*. 2018;52:397–419.
27. Zong C, Lu S, Chapman AR, Xie XS. Genome-Wide Detection of Single-Nucleotide and Copy-Number Variations of a Single Human Cell. *Science*. 2012;338:1622.
28. Chronister WD, Burbulis IE, Wierman MB, Wolpert MJ, Haakenson MF, Smith ACB, et al. Neurons with Complex Karyotypes Are Rare in Aged Human Neocortex. *Cell Reports*. 2019;26:825-835.e7.
29. Zhang ZD, Du J, Lam H, Abyzov A, Urban AE, Snyder M, et al. Identification of genomic indels and structural variations using split reads. *BMC Genomics*. 2011;12:375–375.
30. Zhang L, Bai W, Yuan N, Du Z. Comprehensively benchmarking applications for detecting copy number variation. *PLOS Computational Biology*. 2019;15:e1007069.
31. Pirooznia M, Goes FS, Zandi PP. Whole-genome CNV analysis: advances in computational approaches. *Front Genet*. 2015;6:138–138.
32. Wang R, Lin D-Y, Jiang Y. SCOPE: a normalization and copy number estimation method for single-cell DNA sequencing. *bioRxiv*. 2019;:594267.
33. Wang X, Chen H, Zhang NR. DNA copy number profiling using single-cell sequencing. *Brief Bioinform*. 2018;19:731–6.

34. Gawad C, Koh W, Quake SR. Single-cell genome sequencing: current state of the science. *Nature Reviews Genetics*. 2016;17:175.
35. Macaulay IC, Voet T. Single Cell Genomics: Advances and Future Perspectives. *PLOS Genetics*. 2014;10:e1004126.
36. Wang Y, Navin NE. Advances and Applications of Single-Cell Sequencing Technologies. *Molecular Cell*. 2015;58:598–609.
37. Estévez-Gómez N, Prieto T, Guillaumet-Adkins A, Heyn H, Prado-López S, Posada D. Comparison of single-cell whole-genome amplification strategies. *bioRxiv*. 2018;:443754.
38. Hou Y, Wu K, Shi X, Li F, Song L, Wu H, et al. Comparison of variations detection between whole-genome amplification methods used in single-cell resequencing. *GigaScience*. 2015;4. doi:10.1186/s13742-015-0068-3.
39. Huang L, Ma F, Chapman A, Lu S, Xie XS. Single-Cell Whole-Genome Amplification and Sequencing: Methodology and Applications. *Annu Rev Genom Hum Genet*. 2015;16:79–102.
40. Deleye L, Tilleman L, Vander Plaetsen A-S, Cornelis S, Deforce D, Van Nieuwerburgh F. Performance of four modern whole genome amplification methods for copy number variant detection in single cells. *Sci Rep*. 2017;7:3422–3422.
41. Duan M, Hao J, Cui S, Worthley DL, Zhang S, Wang Z, et al. Diverse modes of clonal evolution in HBV-related hepatocellular carcinoma revealed by single-cell genome sequencing. *Cell Research*. 2018;28:359–73.
42. Hughes AEO, Magrini V, Demeter R, Miller CA, Fulton R, Fulton LL, et al. Clonal architecture of secondary acute myeloid leukemia defined by single-cell sequencing. *PLoS Genet*. 2014;10:e1004462–e1004462.

43. Macaulay IC, Haerty W, Kumar P, Li YI, Hu TX, Teng MJ, et al. G&T-seq: parallel sequencing of single-cell genomes and transcriptomes. *Nature Methods*. 2015;12:519.
44. Neves RPL, Raba K, Schmidt O, Honisch E, Meier-Stiegen F, Behrens B, et al. Genomic High-Resolution Profiling of Single CK<sup>pos</sup>/CD45<sup>neg</sup> Flow-Sorting Purified Circulating Tumor Cells from Patients with Metastatic Breast Cancer. *Clin Chem*. 2014;60:1290.
45. Paolillo C, Mu Z, Rossi G, Schiewer MJ, Nguyen T, Austin L, et al. Detection of Activating Estrogen Receptor Gene (ESR1) Mutations in Single Circulating Tumor Cells. *Clin Cancer Res*. 2017;23:6086–93.
46. Rohrback S, April C, Kaper F, Rivera RR, Liu CS, Siddoway B, et al. Submegabase copy number variations arise during cerebral cortical neurogenesis as revealed by single-cell whole-genome sequencing. *Proc Natl Acad Sci USA*. 2018;115:10804.
47. Vitak SA, Torkency KA, Rosenkrantz JL, Fields AJ, Christiansen L, Wong MH, et al. Sequencing thousands of single-cell genomes with combinatorial indexing. *Nat Methods*. 2017;14:302–8.
48. Wang Y, Waters J, Leung ML, Unruh A, Roh W, Shi X, et al. Clonal evolution in breast cancer revealed by single nucleus genome sequencing. *Nature*. 2014;512:155–60.
49. Zahn H, Steif A, Laks E, Eirew P, VanInsberghe M, Shah SP, et al. Scalable whole-genome single-cell library preparation without preamplification. *Nature Methods*. 2017;14:167–73.
50. Burbulis IE, Wierman MB, Wolpert M, Haakenson M, Lopes M-B, Schiff D, et al. Improved molecular karyotyping in glioblastoma. *Mutation Research/Fundamental and Molecular Mechanisms of Mutagenesis*. 2018;811:16–26.
51. Campbell IM, Shaw CA, Stankiewicz P, Lupski JR. Somatic mosaicism: implications for disease and transmission genetics. *Trends Genet*. 2015;31:382–92.

52. Gardner MJ, Hall N, Fung E, White O, Berriman M, Hyman RW, et al. Genome sequence of the human malaria parasite *Plasmodium falciparum*. *Nature*. 2002;419:498–511.
53. Nkhoma SC, Trevino SG, Gorena KM, Nair S, Khoswe S, Jett C, et al. Resolving within-host malaria parasite diversity using single-cell sequencing. *bioRxiv*. 2018;;391268.
54. Trevino SG, Nkhoma SC, Nair S, Daniel BJ, Moncada K, Khoswe S, et al. High-Resolution Single-Cell Sequencing of Malaria Parasites. *Genome Biol Evol*. 2017;9:3373–83.
55. Lasken RS, Stockwell TB. Mechanism of chimera formation during the Multiple Displacement Amplification reaction. *BMC Biotechnology*. 2007;7:19.
56. Huckaby AC, Granum CS, Carey MA, Szlachta K, Al-Barghouthi B, Wang Y-H, et al. Complex DNA structures trigger copy number variation across the *Plasmodium falciparum* genome. *Nucleic Acids Research*. 2018;47:1615–27.
57. Simam J, Rono M, Ngoi J, Nyonda M, Mok S, Marsh K, et al. Gene copy number variation in natural populations of *Plasmodium falciparum* in Eastern Africa. *BMC Genomics*. 2018;19:372–372.
58. Oyola SO, Manske M, Campino S, Claessens A, Hamilton WL, Kekre M, et al. Optimized whole-genome amplification strategy for extremely AT-biased template. *DNA Res*. 2014;21:661–71.
59. de Bourcy CFA, De Vlaminc I, Kanbar JN, Wang J, Gawad C, Quake SR. A Quantitative Comparison of Single-Cell Whole Genome Amplification Methods. *PLOS ONE*. 2014;9:e105585.
60. Ning L, Li Z, Wang G, Hu W, Hou Q, Tong Y, et al. Quantitative assessment of single-cell whole genome amplification methods for detecting copy number variation using hippocampal neurons. *Scientific Reports*. 2015;5:11415.

61. Haynes JD, Diggs CL, Hines FA, Desjardins RE. Culture of human malaria parasites *Plasmodium falciparum*. *Nature*. 1976;263:767–9.
62. Bei AK, Desimone TM, Badiane AS, Ahouidi AD, Dieye T, Ndiaye D, et al. A flow cytometry-based assay for measuring invasion of red blood cells by *Plasmodium falciparum*. *Am J Hematol*. 2010;85:234–7.
63. Brown AC, Moore CC, Guler JL. Cholesterol-dependent enrichment of understudied erythrocytic stages of human *Plasmodium* parasites. *Scientific Reports*. 2020;10:4591.
64. T. Maniatis, Sambrook J, Fritsch EF. *Molecular cloning: a laboratory manual*. Cold Spring Harbor, NY: Cold Spring Harbor Laboratory Press; 1989.
65. Ribaut C, Berry A, Chevalley S, Reybier K, Morlais I, Parzy D, et al. Concentration and purification by magnetic separation of the erythrocytic stages of all human *Plasmodium* species. *Malaria Journal*. 2008;7:45.
66. Jensen MA, Fukushima M, Davis RW. DMSO and Betaine Greatly Improve Amplification of GC-Rich Constructs in De Novo Synthesis. *PLOS ONE*. 2010;5:e11024.
67. Pickard AL, Wongsrichanalai C, Purfield A, Kamwendo D, Emery K, Zalewski C, et al. Resistance to antimalarials in Southeast Asia and genetic polymorphisms in *pfmdr1*. *Antimicrob Agents Chemother*. 2003;47:2418–23.
68. Perandin F, Manca N, Calderaro A, Piccolo G, Galati L, Ricci L, et al. Development of a real-time PCR assay for detection of *Plasmodium falciparum*, *Plasmodium vivax*, and *Plasmodium ovale* for routine clinical diagnosis. *J Clin Microbiol*. 2004;42:1214–9.
69. Dean FB, Hosono S, Fang L, Wu X, Faruqi AF, Bray-Ward P, et al. Comprehensive human genome amplification using multiple displacement amplification. *Proc Natl Acad Sci USA*. 2002;99:5261.



70. Bushnell B. BBMap. <http://sourceforge.net/projects/bbmap/> (2019). Accessed 1 May 2019.
71. Chiang C, Layer RM, Faust GG, Lindberg MR, Rose DB, Garrison EP, et al. SpeedSeq: ultra-fast personal genome analysis and interpretation. *Nat Methods*. 2015;12:966–8.
72. Li H, Handsaker B, Wysoker A, Fennell T, Ruan J, Homer N, et al. The Sequence Alignment/Map format and SAMtools. *Bioinformatics*. 2009;25:2078–9.
73. Sims D, Sudbery I, Illott NE, Heger A, Ponting CP. Sequencing depth and coverage: key considerations in genomic analyses. *Nature Reviews Genetics*. 2014;15:121–32.
74. García-Alcalde F, Okonechnikov K, Carbonell J, Cruz LM, Götz S, Tarazona S, et al. Qualimap: evaluating next-generation sequencing alignment data. *Bioinformatics*. 2012;28:2678–9.
75. Quinlan AR, Hall IM. BEDTools: a flexible suite of utilities for comparing genomic features. *Bioinformatics*. 2010;26:841–2.
76. Krzywinski M, Schein J, Birol I, Connors J, Gascoyne R, Horsman D, et al. Circos: an information aesthetic for comparative genomics. *Genome Res*. 2009;19:1639–45.
77. Cheong W-H, Tan Y-C, Yap S-J, Ng K-P. ClicO FS: an interactive web-based service of Circos. *Bioinformatics*. 2015;31:3685–7.
78. Chen C, Xing D, Tan L, Li H, Zhou G, Huang L, et al. Single-cell whole-genome analyses by Linear Amplification via Transposon Insertion (LIANTI). *Science*. 2017;356:189.
79. B. Marwick, K. Krishnamoorthy. Cvequality: Tests for the Equality of Coefficients of Variation from Multiple Groups. R software package version 0.2.0. <https://github.com/benmarwick/cvequality>. Accessed 1 Oct 2019.

80. Chen D, Zhen H, Qiu Y, Liu P, Zeng P, Xia J, et al. Comparison of single cell sequencing data between two whole genome amplification methods on two sequencing platforms. *Sci Rep.* 2018;8:4963–4963.
81. Harrell F. E. Hmisc: Harrell miscellaneous (R package Version 4.3-0). <https://CRAN.R-project.org/package=Hmisc>. Accessed 1 May 2019.
82. Gregory R. Warnes, Ben Bolker, Lodewijk Bonebakker, Robert Gentleman, Wolfgang Huber, Andy Liaw, Thomas Lumley, et al. Gplots: Various R programming tools for plotting data. R package version 3.0.1.1. <https://cran.r-project.org/web/packages/gplots/index.html>. Accessed 1 Oct 2019.
83. Otto TD, Böhme U, Sanders M, Reid A, Bruske EI, Duffy CW, et al. Long read assemblies of geographically dispersed *Plasmodium falciparum* isolates reveal highly structured subtelomeres. *Wellcome Open Res.* 2018;3:52–52.
84. Layer RM, Chiang C, Quinlan AR, Hall IM. LUMPY: a probabilistic framework for structural variant discovery. *Genome Biology.* 2014;15:R84.
85. Garvin T, Aboukhalil R, Kendall J, Baslan T, Atwal GS, Hicks J, et al. Interactive analysis and assessment of single-cell copy-number variations. *Nature methods.* 2015;12:1058–60.
86. Auburn S, Campino S, Clark TG, Djimde AA, Zongo I, Pinches R, et al. An Effective Method to Purify *Plasmodium falciparum* DNA Directly from Clinical Blood Samples for Whole Genome High-Throughput Sequencing. *PLOS ONE.* 2011;6:e22213.
87. Oyola SO, Gu Y, Manske M, Otto TD, O’Brien J, Alcock D, et al. Efficient depletion of host DNA contamination in malaria clinical sequencing. *J Clin Microbiol.* 2013;51:745–51.

88. Zhang X, Liang B, Xu X, Zhou F, Kong L, Shen J, et al. The comparison of the performance of four whole genome amplification kits on ion proton platform in copy number variation detection. *Bioscience Reports*. 2017;37. doi:10.1042/BSR20170252.
89. Scherf A, Carter R, Petersen C, Alano P, Nelson R, Aikawa M, et al. Gene inactivation of *Pf11-1* of *Plasmodium falciparum* by chromosome breakage and healing: identification of a gametocyte-specific protein with a potential role in gametogenesis. *EMBO J*. 1992;11:2293–301.
90. Wang Y, Gao Z, Xu Y, Li G, He L, Qian P. An evaluation of multiple annealing and looping based genome amplification using a synthetic bacterial community. *The Chinese Society of Oceanography*. 2016;35:131–6.
91. Ohkubo S, Muto A, Kawauchi Y, Yamao F, Osawa S. The ribosomal protein gene cluster of *Mycoplasma capricolum*. *Molecular and General Genetics MGG*. 1987;210:314–22.
92. Andersson SGE, Zomorodipour A, Andersson JO, Sicheritz-Pontén T, Alsmark UCM, Podowski RM, et al. The genome sequence of *Rickettsia prowazekii* and the origin of mitochondria. *Nature*. 1998;396:133–40.
93. Fraser CM, Casjens S, Huang WM, Sutton GG, Clayton R, Lathigra R, et al. Genomic sequence of a Lyme disease spirochaete, *Borrelia burgdorferi*. *Nature*. 1997;390:580–6.
94. Lorenzi HA, Puiu D, Miller JR, Brinkac LM, Amedeo P, Hall N, et al. New assembly, reannotation and analysis of the *Entamoeba histolytica* genome reveal new genomic features and protein content information. *PLoS Negl Trop Dis*. 2010;4:e716–e716.
95. Ohama T, Muto A, Osawa S. Role of GC-biased mutation pressure on synonymous codon choice in *Micrococcus luteus* a bacterium with a high genomic GC-content. *Nucleic Acids Research*. 1990;18:1565–9.
96. Lasken RS. Single-cell sequencing in its prime. *Nature Biotechnology*. 2013;31:211–2.

97. Viguera E, Canceill D, Ehrlich SD. In vitro replication slippage by DNA polymerases from thermophilic organisms. *Journal of Molecular Biology*. 2001;312:323–33.
98. Ignatov KB, Barsova EV, Fradkov AF, Blagodatskikh KA, Kramarova TV, Kramarov VM. A strong strand displacement activity of thermostable DNA polymerase markedly improves the results of DNA amplification. *BioTechniques*. 2014;57:81–7.
99. Srisutham S, Suwannasin K, Mathema VB, Sriprawat K, Smithuis FM, Nosten F, et al. Utility of *Plasmodium falciparum* DNA from rapid diagnostic test kits for molecular analysis and whole genome amplification. *Malaria Journal*. 2020;19:193.
100. Carey MA, Covelli V, Brown A, Medlock GL, Haaren M, Cooper JG, et al. Influential Parameters for the Analysis of Intracellular Parasite Metabolomics. *mSphere*. 2018;3:e00097-18.
101. Waldvogel Abramowski S, Tirefort D, Lau P, Guichebaron A, Taleb S, Modoux C, et al. Cell-free nucleic acids are present in blood products and regulate genes of innate immune response. *Transfusion*. 2018;58:1671–81.
102. Venkatesan M, Amaratunga C, Campino S, Auburn S, Koch O, Lim P, et al. Using CF11 cellulose columns to inexpensively and effectively remove human DNA from *Plasmodium falciparum*-infected whole blood samples. *Malaria Journal*. 2012;11:41.
103. Jacob CG, Tan JC, Miller BA, Tan A, Takala-Harrison S, Ferdig MT, et al. A microarray platform and novel SNP calling algorithm to evaluate *Plasmodium falciparum* field samples of low DNA quantity. *BMC Genomics*. 2014;15:719–719.
104. Manske M, Miotto O, Campino S, Auburn S, Almagro-Garcia J, Maslen G, et al. Analysis of *Plasmodium falciparum* diversity in natural infections by deep sequencing. *Nature*. 2012;487:375–9.

105. McFeters GA, Broadaway SC, Pyle BH, Egozy Y. Distribution of bacteria within operating laboratory water purification systems. *Appl Environ Microbiol.* 1993;59:1410–5.
106. Kulakov LA, McAlister MB, Ogden KL, Larkin MJ, O’Hanlon JF. Analysis of bacteria contaminating ultrapure water in industrial systems. *Appl Environ Microbiol.* 2002;68:1548–55.
107. Nogami T, Ohto T, Kawaguchi O, Zaitso Y, Sasaki S. Estimation of Bacterial Contamination in Ultrapure Water: Application of the Anti-DNA Antibody. *Anal Chem.* 1998;70:5296–301.
108. Woyke T, Sczyrba A, Lee J, Rinke C, Tighe D, Clingenpeel S, et al. Decontamination of MDA Reagents for Single Cell Whole Genome Amplification. *PLOS ONE.* 2011;6:e26161.
109. Salter SJ, Cox MJ, Turek EM, Calus ST, Cookson WO, Moffatt MF, et al. Reagent and laboratory contamination can critically impact sequence-based microbiome analyses. *BMC Biology.* 2014;12:87.
110. Rand KH, Houck H. Taq polymerase contains bacterial DNA of unknown origin. *Molecular and Cellular Probes.* 1990;4:445–50.
111. Kil E-J, Kim S, Lee Y-J, Kang E-H, Lee M, Cho S-H, et al. Advanced loop-mediated isothermal amplification method for sensitive and specific detection of Tomato chlorosis virus using a uracil DNA glycosylase to control carry-over contamination. *Journal of Virological Methods.* 2015;213:68–74.
112. Hou Y, Fan W, Yan L, Li R, Lian Y, Huang J, et al. Genome Analyses of Single Human Oocytes. *Cell.* 2013;155:1492–506.
113. Navin N, Kendall J, Troge J, Andrews P, Rodgers L, McIndoo J, et al. Tumour evolution inferred by single-cell sequencing. *Nature.* 2011;472:90–4.

114. McConnell MJ, Lindberg MR, Brennand KJ, Piper JC, Voet T, Cowing-Zitron C, et al. Mosaic copy number variation in human neurons. *Science*. 2013;342:632–7.
115. Fu Y, Li C, Lu S, Zhou W, Tang F, Xie XS, et al. Uniform and accurate single-cell sequencing based on emulsion whole-genome amplification. *Proc Natl Acad Sci USA*. 2015;112:11923.
116. Chen M, Song P, Zou D, Hu X, Zhao S, Gao S, et al. Comparison of Multiple Displacement Amplification (MDA) and Multiple Annealing and Looping-Based Amplification Cycles (MALBAC) in Single-Cell Sequencing. *PLOS ONE*. 2014;9:e114520.
117. Rosseel T, Van Borm S, Vandebussche F, Hoffmann B, van den Berg T, Beer M, et al. The origin of biased sequence depth in sequence-independent nucleic acid amplification and optimization for efficient massive parallel sequencing. *PLoS One*. 2013;8:e76144–e76144.

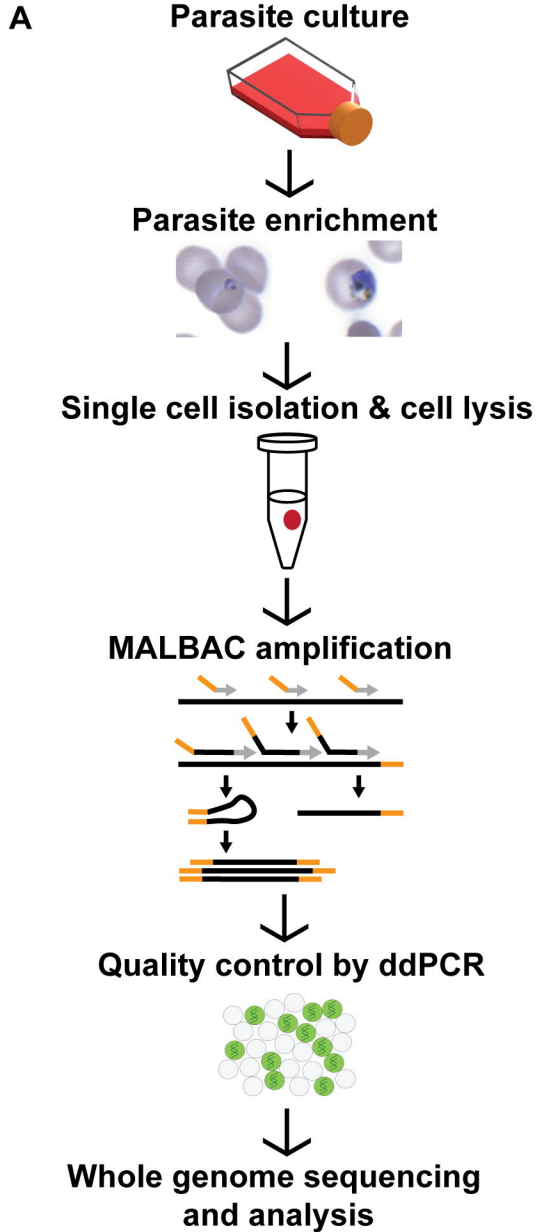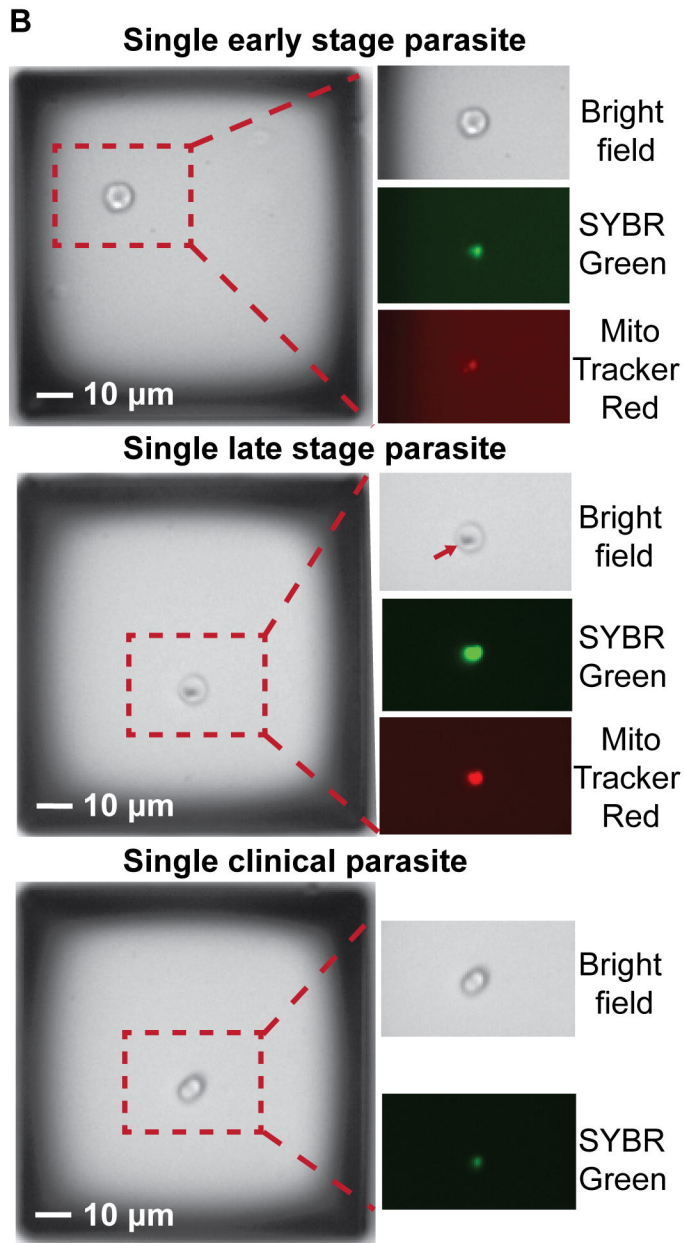

**A** ■ Bacteria ■ Human  
■ Others ■ Plasmodium

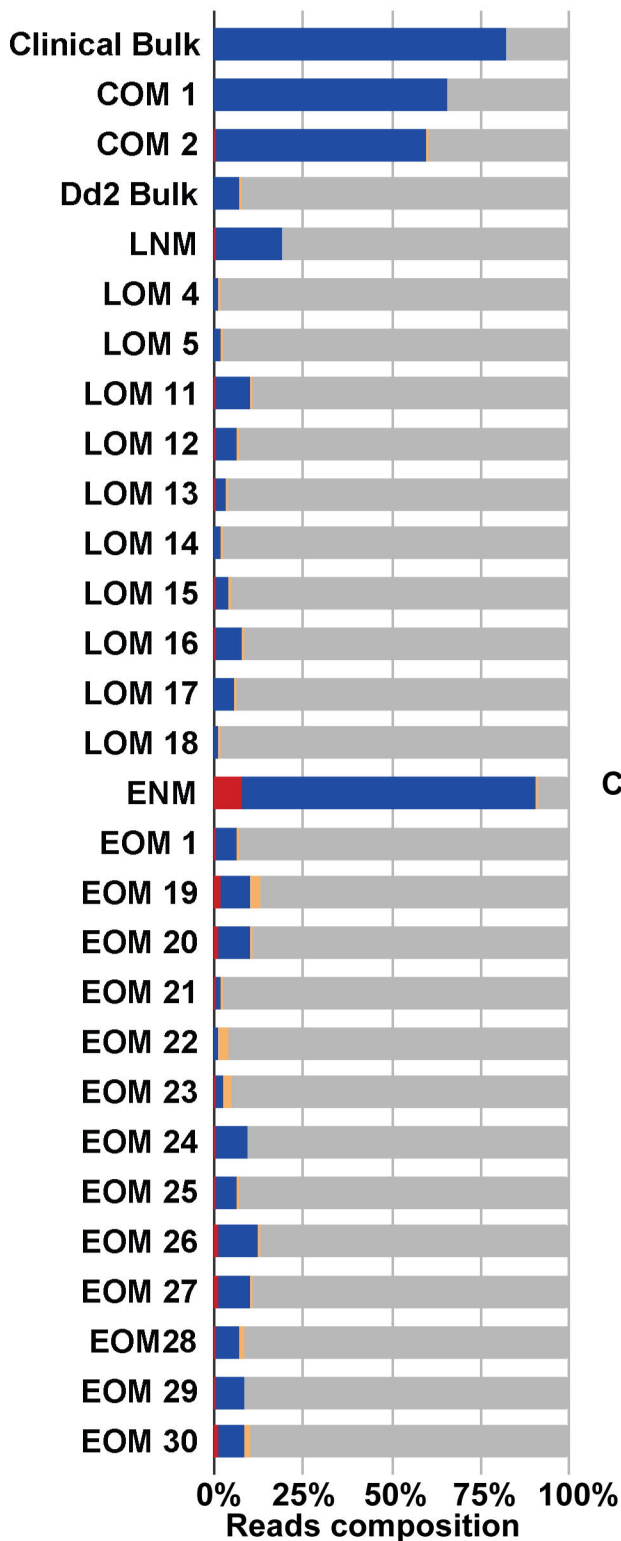

**B** ■ EOM ■ LOM ■ ENM ■ LNM  
■ Dd2 Bulk ■ COM

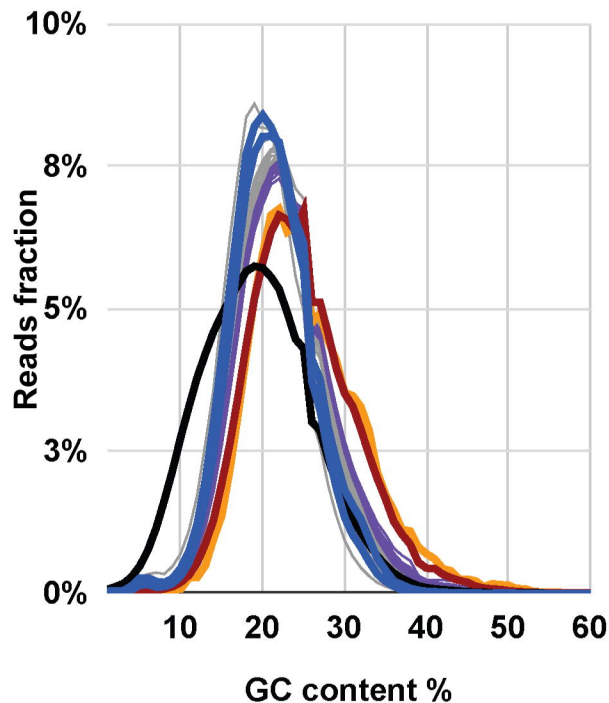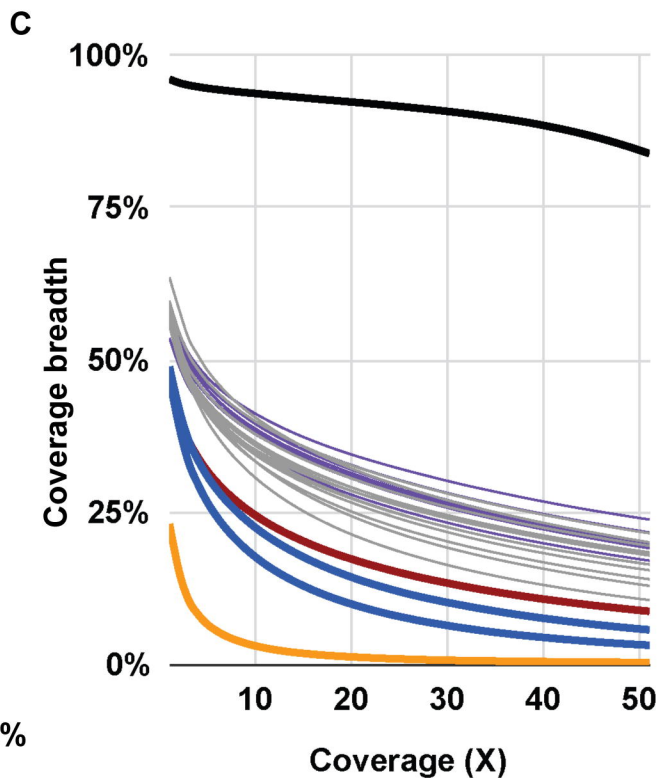



**A**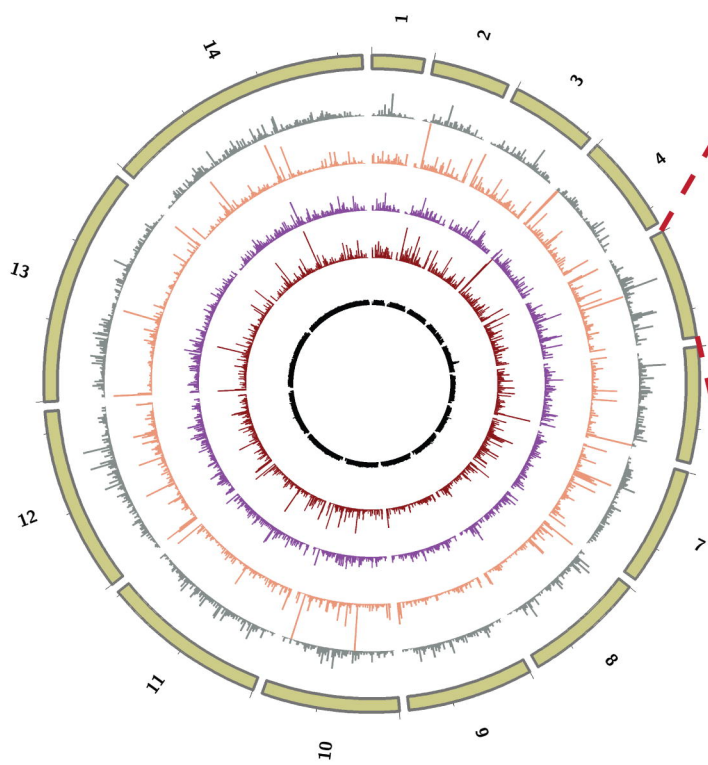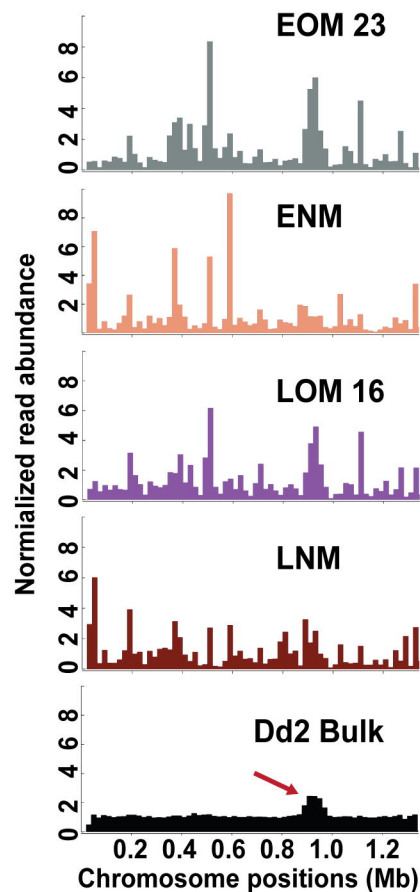**B**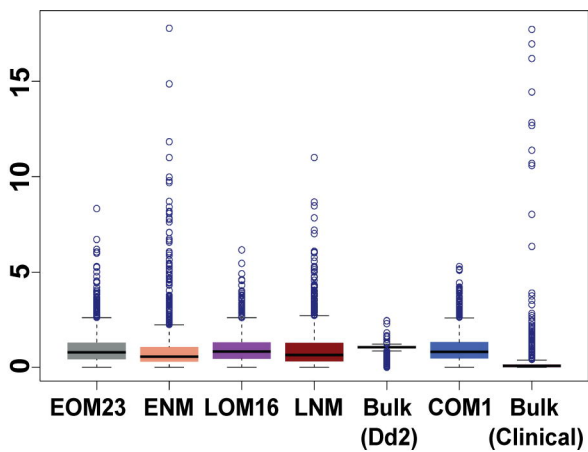**C**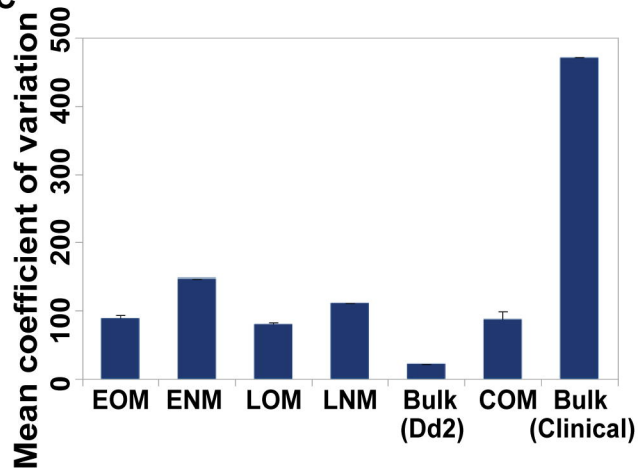

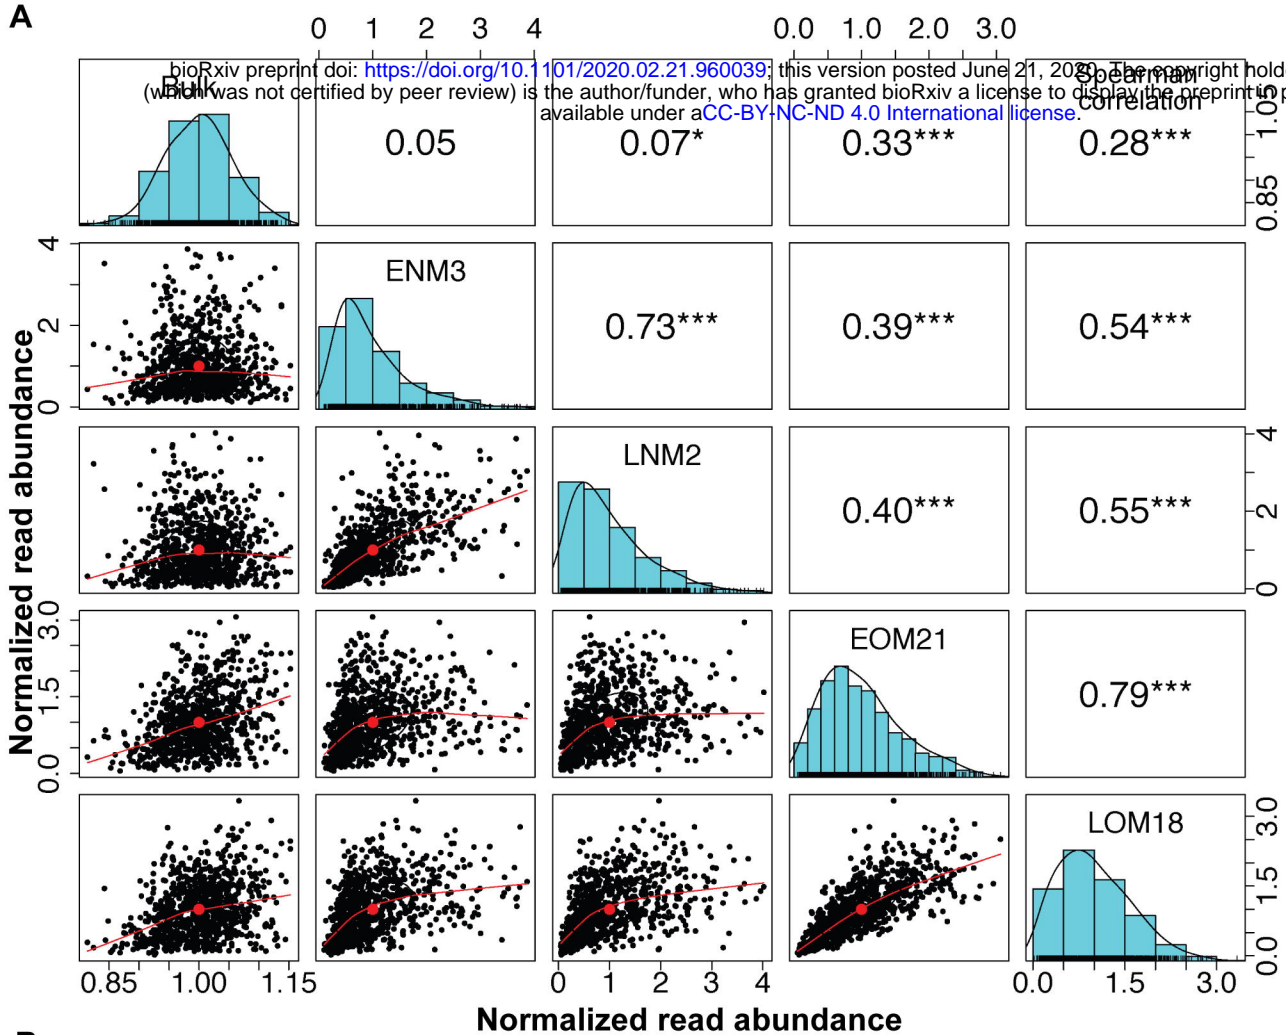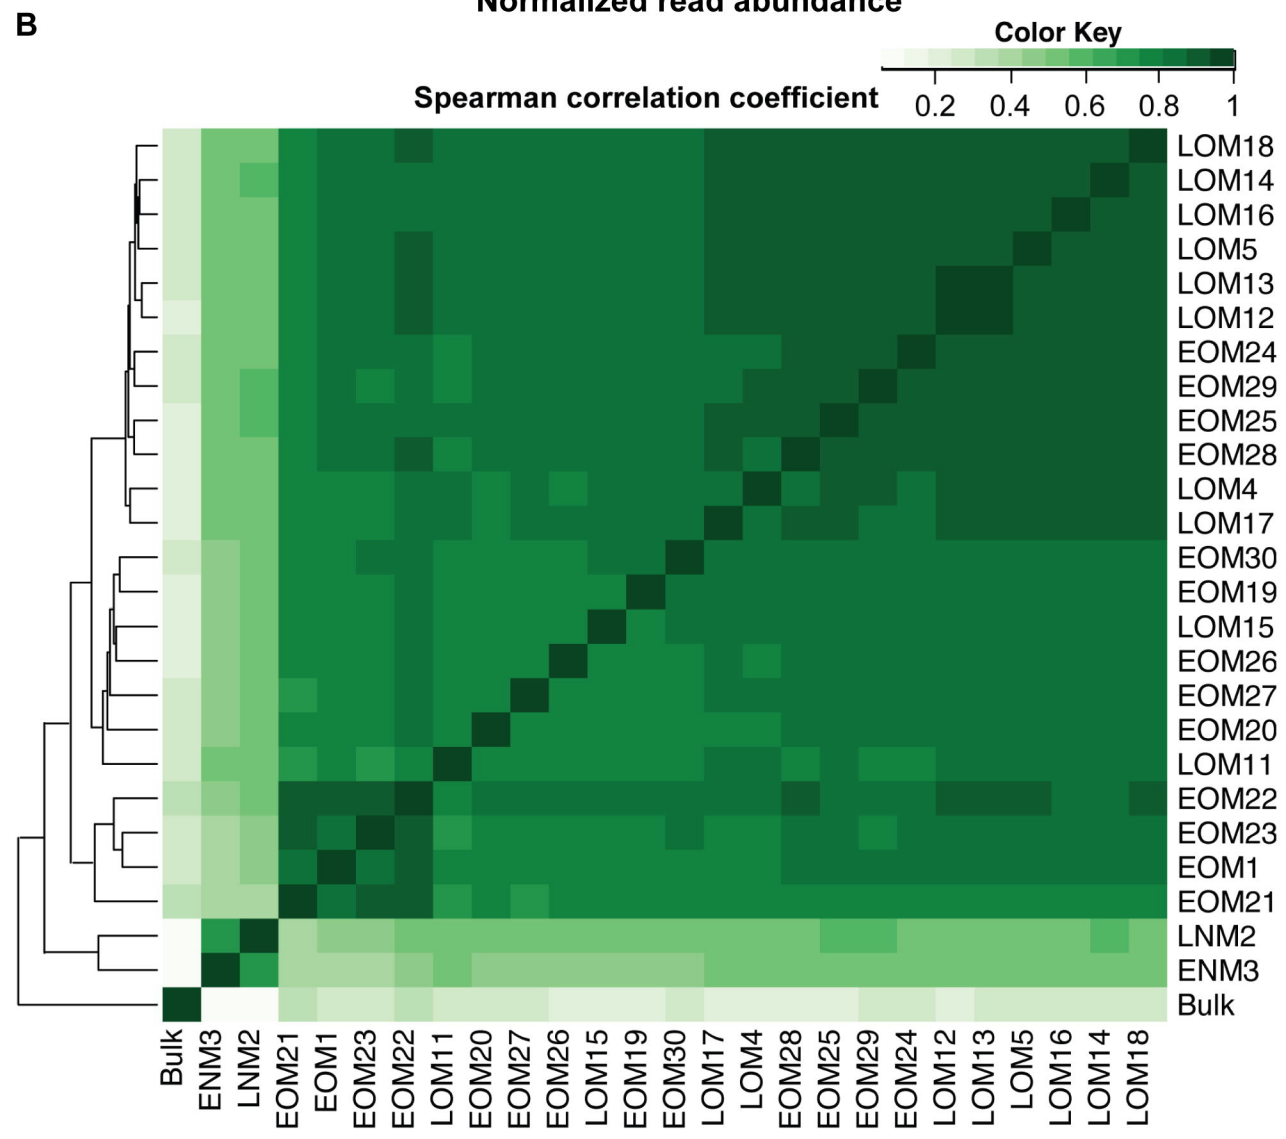

Source: https://www.biorxiv.org/content/10.1101/2020.02.21.960039v2.full.pdf
